# Supplementary material
Source: PubMed Central journal article supplement (PMC5468171)
Supplement: NIHMS861210-supplement-Supplemental_information.pdf [file NIHMS861210-supplement-Supplemental_information.pdf]

## Supporting Information

Untangling the impacts of climate change on waterborne diseases: A systematic review of relationships between diarrheal diseases and temperature, rainfall, flooding, and drought

Karen Levy, Andrew P. Woster, Rebecca S. Goldstein, Elizabeth J. Carlton

|           |                                                                                                                                                                 |         |
|-----------|-----------------------------------------------------------------------------------------------------------------------------------------------------------------|---------|
| Table S1  | Articles included in the systematic review of the relationship between ambient temperature and diarrheal diseases                                               | S2-S13  |
| Table S2a | Articles included in the systematic review of the relationship between heavy rainfall and diarrheal diseases—systematically collected datasets                  | S14-S16 |
| Table S2b | Articles included in the systematic review of the relationship between heavy rainfall and diarrheal diseases—outbreak reports                                   | S17-S21 |
| Table S3a | Articles included in the systematic review of the relationship between flooding and diarrheal diseases—studies with an explicitly defined comparison group      | S22-S27 |
| Table S3b | Articles included in the systematic review of the relationship between flooding and diarrheal diseases—outbreak reports                                         | S28-S29 |
| Table S4  | Articles included in the systematic review of the relationship between drought and diarrheal diseases                                                           | S30     |
| Table S5  | Summary of quantitative associations between diarrhea and drought, flooding, heavy rainfall and temperature reported in 67 articles with quantitative estimates | S31     |

**Supplemental Material, Table S1: Articles included in the systematic review of the relationship between ambient temperature and diarrheal diseases. Direction of association columns indicate the number of analyses presented by the authors of the article that resulted in a positive ("+"), negative ("-"), or neutral ("0") association between exposure of interest and outcome, based on statistical analysis. Positive or negative relationships were defined as  $p < 0.05$  or 95% CI did not include the null. "NA" indicates article did not present results of a statistical analysis.**

| Reference                 | Location                                      | Period      | Ages     | Pathogen  | Exposure Definition                                         | Outcome Definition                                                                                         | Results/ Conclusion                                                                                                                                                      | Comments                                                                                                                                                 | Data Source           | Study Size                              | Direction of Association |   |   |    |
|---------------------------|-----------------------------------------------|-------------|----------|-----------|-------------------------------------------------------------|------------------------------------------------------------------------------------------------------------|--------------------------------------------------------------------------------------------------------------------------------------------------------------------------|----------------------------------------------------------------------------------------------------------------------------------------------------------|-----------------------|-----------------------------------------|--------------------------|---|---|----|
|                           |                                               |             |          |           |                                                             |                                                                                                            |                                                                                                                                                                          |                                                                                                                                                          |                       |                                         | +                        | - | 0 | NA |
| Alexander et al. 2013     | Botswana                                      | 1974 - 2003 | All ages | All-cause | Minimum temperature (monthly)                               | Monthly proportion deviation from yearly mean diarrheal incidence reported to government health facilities | Temperature positively associated with diarrhea in the dry season and negatively associated with diarrhea in the wet season.                                             | No association between diarrhea and maximum or mean monthly temperature (results not shown).                                                             | Surveillance Records  | NA                                      | 1                        | 1 |   |    |
| Ali et al. 2013           | Matlab, Bangladesh                            | 1988 - 2001 | All ages | Bacterial | Minimum temperature (monthly)                               | Monthly incidence of cholera diagnosed at ICDDR,B                                                          | For each 1°C increase in monthly minimum temperature, cholera incidence increased by 6%.                                                                                 | Adjusted for season, autocorrelation, and sea surface temperature. Also examined maximum temperature but correlation stronger using minimum temperature. | Hospital Surveillance | 4,157 cholera cases in the study period |                          | 1 |   |    |
| Atchison et al. 2010      | England, Wales, Scotland, and the Netherlands | 1993 - 2007 | < 5      | Viral     | Population-weighted, mean temperature (weekly)              | Weekly counts of laboratory-confirmed rotavirus cases                                                      | 13% decrease in rotavirus cases for each 1°C increase in weekly temperature above a threshold of 5°C.                                                                    | Temperature measure is population weighted, based on mean of multiple weather stations.                                                                  | Surveillance Records  | NA                                      |                          |   | 1 |    |
| Bandyopadhyay et al. 2012 | 14 countries in sub-Saharan Africa            | 1991 - 2000 | < 3      | All-cause | Maximum and minimum temperatures (3-month weighted average) | 2-week, self-reported diarrhea prevalence from the DHS survey                                              | Diarrhea prevalence positively associated with average monthly maximum temperature and negatively associated with average monthly minimum temperature in the dry season. | Excluded from the quantitative analysis because used 3-month average temperature.                                                                        | Surveillance Records  | NA                                      | 0                        | 0 |   | 1  |
| Bennett et al. 2012       | Lima, Peru                                    | 1995 - 1998 | < 13     | All-cause | El Niño period versus period prior to El Niño onset         | Household-reported diarrhea assessed by daily survey                                                       | Higher incidence of diarrhea was observed in El Niño vs. control period. Peak in diarrhea incidence shifted from summer/fall to spring during El Niño periods.           | Protozoan infection ( <i>G. lamblia</i> , <i>Cryptosporidium</i> and <i>Cyclospora</i> ) by weekly stool sample also assessed.                           | Cohort study          | 367 children                            |                          |   |   | 1  |
| Bern et al. 2000          | Guatemala City, Guatemala                     | 1997 - 1998 | All ages | Protozoan | Average temperature (monthly)                               | Prevalence of laboratory-confirmed <i>Cyclospora</i> and <i>Cryptosporidium</i> among outpatients          | <i>Cyclospora</i> prevalence was higher in warmer months but was not clearly associated with temperature.                                                                | <i>Cyclospora</i> prevalence peaked at the onset of rainy season. Also screened people without diarrhea.                                                 | Hospital Study        | 5,520 specimens screened                |                          |   |   | 1  |
| Bhandari et al. 2012      | Jhapa District, Nepal                         | 1999 - 2008 | All ages | All-cause | Maximum and minimum temperature (monthly)                   | Cases of diarrhea reported to the Department of Health Services                                            | No significant association between diarrhea and maximum or minimum temperature.                                                                                          |                                                                                                                                                          | Surveillance Records  | NA                                      |                          |   |   | 2  |

Supplemental Material, Table S1 (continued) – Ambient Temperature

| Reference                | Location                         | Period      | Ages     | Pathogen  | Exposure Definition                       | Outcome Definition                                                                                     | Results/ Conclusion                                                                                                                                                                               | Comments                                                                                                                                            | Data Source          | Study Size                                       | Direction of Association |   |   |    |
|--------------------------|----------------------------------|-------------|----------|-----------|-------------------------------------------|--------------------------------------------------------------------------------------------------------|---------------------------------------------------------------------------------------------------------------------------------------------------------------------------------------------------|-----------------------------------------------------------------------------------------------------------------------------------------------------|----------------------|--------------------------------------------------|--------------------------|---|---|----|
|                          |                                  |             |          |           |                                           |                                                                                                        |                                                                                                                                                                                                   |                                                                                                                                                     |                      |                                                  | +                        | - | 0 | NA |
| Bi et al. 2008           | Adelaide and Brisbane, Australia | 1990 - 2005 | All ages | Bacterial | Maximum temperature (weekly)              | Weekly cases of laboratory-confirmed <i>Campylobacter</i> infections reported to Departments of Health | Temperature and <i>Campylobacter</i> are negatively associated in Adelaide (using a 9 week lag), and positively associated in Brisbane (6 and 3 week lag).                                        | Authors do not present minimum temperature models but say the results are similar to maximum temperature model results.                             | Surveillance Records | 34,908 cases                                     | 1                        | 1 |   |    |
| Britton et al. 2010      | New Zealand                      | 1965 - 2006 | All ages | Bacterial | Average temperature (monthly)             | Monthly number of salmonellosis cases reported to the national disease surveillance system             | 15% increase in reported <i>Salmonella</i> cases for each 1° C increase in monthly temperature in the same month.                                                                                 | When analysis was stratified by decade, the strongest association was observed in 1965-1974 and decreased in subsequent decades.                    | Surveillance Records | NA                                               |                          | 1 |   |    |
| Chai et al. 2001         | Chollanam-do Province, Korea     | 1996 - 1997 | All ages | Protozoan | Average temperature (monthly)             | Monthly prevalence of <i>Cryptosporidium</i> positive stool samples                                    | Average monthly temperature not associated with <i>Cryptosporidium</i> oocyst prevalence ( $r=0.04$ ).                                                                                            | 77% of the residents were over the age of 50.                                                                                                       | Cohort Study         | 135 villagers                                    |                          |   | 1 |    |
| Chakravarti et al. 1992a | New Dehli, India                 | 1987 - 1989 | < 5      | Viral     | Minimum and maximum temperature (monthly) | Monthly percent of acute gastroenteritis patients that tested positive for rotavirus at a hospital     | Monthly minimum temperature was negatively correlated with monthly rotavirus prevalence. Maximum temperature was not associated with rotavirus.                                                   | Correlation coefficients not provided. An earlier analysis of 288 children from the same population found no association (Chakravarti et al 1992b). | Hospital Study       | 978 children                                     | 1                        | 1 |   |    |
| Checkley et al. 2000     | Lima, Peru                       | 1993 - 1998 | < 10     | All-cause | Average temperature (daily)               | Number of daily admissions for diarrhea at one hospital                                                | El Niño associated with significantly more diarrhea admissions (200% higher than prior rate). RR of daily admission for diarrhea 1.08 for each 1°C increase in temperature in pre El Niño period. | Greater effect of increased ambient temperature during cooler (May-Nov, RR 1.12) vs. warmer months (Dec - April 1.04).                              | Hospital Records     | 57,331 children admitted with diarrhea           | 1                        |   |   |    |
| Chou et al. 2010         | Taiwan                           | 1996 - 2007 | All ages | All-cause | Maximum temperature (monthly)             | Monthly incidence of hospital admissions for diarrhea from National Health Insurance Research database | Maximum temperature positively associated with diarrhea hospitalizations (IRR 1.01, 95% CI 1.00, 1.03). Greatest effect in children, 0-14 years.                                                  | 1-month lagged, maximum temperature was selected for the final model, though several lags and temperature variables were tested univariately.       | Medical Records      | 1,212,621 cases of diarrhea                      | 1                        |   |   |    |
| Dean and Jones 1972      | The Phillipines                  | 1969 - 1970 | All ages | All-cause | Maximum temperature (monthly)             | Monthly diarrhea cases at military ER                                                                  | Increase in number of ER visits for diarrhea that lags behind increases in average daily temperature.                                                                                             | Peak in cases precedes heaviest rainfall periods.                                                                                                   | Hospital Study       | 5,000-6,000 acute gastroenteritis cases annually |                          |   | 1 |    |

Supplemental Material, Table S1 (continued) – Ambient Temperature

| Reference           | Location                                     | Period      | Ages     | Pathogen  | Exposure Definition                       | Outcome Definition                                                                                                                                                       | Results/ Conclusion                                                                                                                                                                                | Comments                                                                                                                                                       | Data Source           | Study Size                                                       | Direction of Association |   |   |    |   |
|---------------------|----------------------------------------------|-------------|----------|-----------|-------------------------------------------|--------------------------------------------------------------------------------------------------------------------------------------------------------------------------|----------------------------------------------------------------------------------------------------------------------------------------------------------------------------------------------------|----------------------------------------------------------------------------------------------------------------------------------------------------------------|-----------------------|------------------------------------------------------------------|--------------------------|---|---|----|---|
|                     |                                              |             |          |           |                                           |                                                                                                                                                                          |                                                                                                                                                                                                    |                                                                                                                                                                |                       |                                                                  | +                        | - | 0 | NA |   |
| Dewan et al. 2013   | Dhaka, Bangladesh                            | 2005 - 2009 | All ages | Bacterial | Average temperature (weekly)              | Weekly number of typhoid cases admitted to 11 hospitals                                                                                                                  | 14.2% increase in the number of cases of typhoid per week for each 1°C increase in temperature (95% CI 4.4%, 25%).                                                                                 | Adjusted for season, river levels, rainfall, holidays, and inter-annual variations.                                                                            | Hospital Records      | 4,355 typhoid cases                                              |                          | 1 |   |    |   |
| D'Souza et al. 2004 | 5 cities in Australia                        | 1991 - 2001 | All ages | Bacterial | Average temperature (monthly)             | Monthly incidence of reported <i>Salmonella</i> infections                                                                                                               | Significant positive association between the monthly incidence of <i>Salmonella</i> infections and 1-month lagged, mean monthly temperature; IRR ranged from 1.04 to 1.10 in the 5 cities studied. |                                                                                                                                                                | Surveillance Records  | 27,652 reported cases                                            |                          | 5 |   |    |   |
| D'Souza et al. 2008 | Brisbane, Canberra, and Melbourne, Australia | 1993 - 2003 | < 5      | Viral     | Average temperature (weekly)              | Incidence of rotavirus infection based on admissions                                                                                                                     | Significant negative association between the weekly incidence of rotavirus infections and one-week lagged mean weekly temperature; IRR ranged from 0.95 to 0.98 in the 3 cities studied.           |                                                                                                                                                                | Surveillance Records  | ~12,800 reported cases                                           |                          |   | 3 |    |   |
| Espejo et al. 1979  | Mexico City, Mexico                          | 1976 - 1978 | < 5      | Viral     | Maximum and minimum temperature (monthly) | Monthly number of rotavirus positive cases among children admitted to two hospitals with diarrhea                                                                        | No association between the number of hospitalized rotavirus positive patients and minimum or maximum temperature.                                                                                  | Little variability in temperature. Infections peaked in autumn.                                                                                                | Hospital Study        | 242 infants and young children hospitalized with gastroenteritis |                          |   |   |    | 1 |
| Fleury et al. 2006  | Alberta and Newfoundland-Labrador, Canada    | 1992 - 2000 | All ages | Bacterial | Average temperature (weekly)              | Weekly incidence of laboratory-confirmed infections reported to National Disease Registries ( <i>Salmonella</i> , pathogenic <i>E. coli</i> , and <i>Campylobacter</i> ) | Significant positive association between temperature and all three bacteria in Alberta, and <i>Campylobacter</i> in Newfoundland-Labrador, but not <i>Salmonella</i> in Newfoundland-Labrador.     | Examined lags of 0-6 weeks. Final model includes a 1-week lag. No pathogenic <i>E. coli</i> reported in Newfoundland-Labrador.                                 | Surveillance Records  | ~20,000 reported cases                                           |                          | 4 |   | 1  |   |
| Glass et al. 1982   | Matlab, Bangladesh                           | 1966 - 1980 | All ages | Bacterial | Maximum and minimum temperature (monthly) | Culture-positive cholera among hospital diarrhea cases                                                                                                                   | No clear relationship between monthly maximum and minimum temperature and the number of cases of cholera.                                                                                          | The classical biotype (1966-1972) typically peaked in the cooler winter months but El Tor biotype (1973 - 1980) showed no clear relationship with temperature. | Hospital Surveillance | 7,141 cholera patients                                           |                          |   |   |    | 1 |

Supplemental Material, Table S1 (continued) – Ambient Temperature

| Reference                | Location             | Period      | Ages     | Pathogen  | Exposure Definition                                                               | Outcome Definition                                                                            | Results/ Conclusion                                                                                                                                                                                        | Comments                                                                                                                                                          | Data Source               | Study Size                                 | Direction of Association |   |   |    |
|--------------------------|----------------------|-------------|----------|-----------|-----------------------------------------------------------------------------------|-----------------------------------------------------------------------------------------------|------------------------------------------------------------------------------------------------------------------------------------------------------------------------------------------------------------|-------------------------------------------------------------------------------------------------------------------------------------------------------------------|---------------------------|--------------------------------------------|--------------------------|---|---|----|
|                          |                      |             |          |           |                                                                                   |                                                                                               |                                                                                                                                                                                                            |                                                                                                                                                                   |                           |                                            | +                        | - | 0 | NA |
| Gomwalk et al. 1993      | Zaria, Nigeria       | 1986 - 1987 | < 6      | Viral     | Maximum and minimum temperature (monthly)                                         | Monthly prevalence of lab-confirmed rotavirus among clinic patients presenting with AGI       | Rotavirus was negatively associated with monthly minimum temperature ( $p < .01$ ) but was not associated with maximum temperature.                                                                        | No estimates of the association provided, only significance.                                                                                                      | Hospital and Clinic Study | 392 stool samples examined, 108 positive   | 1                        | 1 |   |    |
| Haffejee and Moosa 1990  | Durban, South Africa | 1985 - 1987 | < 12     | Viral     | Average temperature (monthly)                                                     | Monthly proportion of lab-confirmed rotavirus among children hospitalized with acute diarrhea | Rotavirus peaked in winter months (May-July), which are cool and dry.                                                                                                                                      | Also saw a minor summer rotavirus peak in 1986.                                                                                                                   | Hospital Study            | 1,142 stool samples examined, 624 positive |                          |   |   | 1  |
| Hall et al. 2011         | Australia            | 2001 - 2002 | > 5      | All-cause | Average temperature (daily)                                                       | Self-reported gastroenteritis in preceding 4 weeks                                            | An average increase of 1°C over the preceding 8 days was associated with a 2.48% increase in self-reported gastroenteritis (HR 1.02, 95% CI 1.01, 1.04).                                                   | Random digit dialing survey assessing the prevalence of diarrhea (3 or more loose stools or two vomits in 24 hours) conducted over 12 months.                     | Community Survey          | 5,670 people                               | 1                        |   |   |    |
| Hashizume et al. 2007    | Dhaka, Bangladesh    | 1996 - 2002 | All ages | All-cause | Average temperature (weekly)                                                      | Weekly cases of non-cholera diarrhea presenting to ICDDR,B                                    | An average increase of 1°C over the preceding 4 weeks was associated with a 5.6% increase in cases of non-cholera diarrhea at ICDDR,B (IRR 1.06, 95%CI 1.03, 1.08).                                        | Adjusted for season, between-year variation, holidays, and rainfall. When rotavirus was excluded, the effect of temperature increased to 6.5% (95%CI 1.04, 1.10). | Hospital Surveillance     | 12,182 diarrhea cases                      | 1                        |   |   |    |
| Hashizume et al. 2008 EI | Dhaka, Bangladesh    | 1996 - 2001 | All ages | Viral     | Average temperature (weekly). Calculated as the mean of daily max and min values. | Weekly cases of lab-confirmed rotavirus diarrhea presenting to ICDDR, B.                      | For a 1°C increase above a threshold of 29°C, there was a 40.2% increase in the risk of a hospital visit for rotavirus diarrhea (IRR 95% CI 1.19, 1.65).                                                   | Adjusted for season, holidays, river level, relative humidity, and between-year variation.                                                                        | Hospital Surveillance     | 3,115 rotavirus cases                      | 1                        |   |   |    |
| Hashizume et al. 2010    | Dhaka, Bangladesh    | 1983 - 2008 | All ages | Bacterial | Average temperature (weekly)                                                      | Weekly cases of cholera presenting to ICDDR,B                                                 | Positive association between temperature, lagged 0-4 weeks, and the number of cholera cases. 57% of the cases over the study period were attributable to 0-4 week lagged temperature (95% CI 52.4, 60.8%). | Adjusted for seasonality, study period, rainfall, and year.                                                                                                       | Hospital Surveillance     | 10,976 cholera patients                    | 1                        |   |   |    |

Supplemental Material, Table S1 (continued) – Ambient Temperature

| Reference         | Location                     | Period      | Ages     | Pathogen  | Exposure Definition                                  | Outcome Definition                                                                              | Results/ Conclusion                                                                                                                                                                                   | Comments                                                                                                                                                               | Data Source           | Study Size                      | Direction of Association |   |   |    |
|-------------------|------------------------------|-------------|----------|-----------|------------------------------------------------------|-------------------------------------------------------------------------------------------------|-------------------------------------------------------------------------------------------------------------------------------------------------------------------------------------------------------|------------------------------------------------------------------------------------------------------------------------------------------------------------------------|-----------------------|---------------------------------|--------------------------|---|---|----|
|                   |                              |             |          |           |                                                      |                                                                                                 |                                                                                                                                                                                                       |                                                                                                                                                                        |                       |                                 | +                        | - | 0 | NA |
| Hu et al. 2007    | Brisbane, Australia          | 1996 - 2004 | All ages | Protozoan | Maximum temperature (monthly)                        | Monthly counts of notified cryptosporidiosis cases                                              | Positive association between maximum temperatures, lagged over 1-3 months, and cryptosporidiosis cases. Predict approximately 50 additional cases per year for a 1°C increase in maximum temperature. | Because this involves the same dataset as Hu et al. 2010, only Hu et al. 2010 was included in quantitative summary of papers.                                          | Surveillance Records  | NA                              | 0                        | 1 |   |    |
| Hu et al. 2010    | Brisbane, Australia          | 1996 - 2004 | All ages | Protozoan | Maximum temperature (weekly)                         | Weekly counts of notified cryptosporidiosis cases                                               | Positive association between cryptosporidiosis notifications and 1°C increase in 0-8 week lagged weekly maximum temperature.                                                                          | Same dataset as Hu et al. 2007, but weekly resolution instead of monthly. When CART was tested, high temperature was also associated with increased cryptosporidiosis. | Surveillance Records  | NA                              | 1                        |   |   |    |
| Huang et al. 2008 | Shenyang, China              | 1950 - 1996 | All ages | Bacterial | Minimum, average, and maximum temperatures (monthly) | Monthly incidence of bacillary dysentery                                                        | Minimum, mean, and maximum monthly temperatures positively associated with the monthly incidence of bacillary dysentery.                                                                              | Authors stratified the analysis into two annual periods: Jan-Jul and Aug-Dec. Similar findings were observed for both periods.                                         | Surveillance Records  | NA                              | 3                        |   |   |    |
| Ijaz et al. 1994  | Al-Ain, United Arab Emirates | 1990 - 1992 | Children | Viral     | Average temperature (monthly)                        | Monthly proportion rotavirus-positive stools collected from hospitalized children with diarrhea | Rotavirus seen throughout the year, but more cases seen in cooler months.                                                                                                                             | No formal analysis presented.                                                                                                                                          | Hospital Study        | 650 stool samples, 139 positive |                          | 1 |   |    |
| Islam et al. 2009 | Matlab, Bangladesh           | 1989 - 2005 | All ages | Bacterial | Average temperature (monthly)                        | Monthly cases of cholera at Matlab Hospital, ICDDR,B                                            | Monthly mean temperature positively associated with monthly count of cholera cases.                                                                                                                   | Classification and regression tree analysis (CART).                                                                                                                    | Hospital Surveillance | NA                              | 1                        |   |   |    |
| Jagai et al. 2009 | Global                       | 1982 - 2005 | All ages | Protozoan | Temperature z-score (monthly)                        | Monthly cryptosporidiosis z-score                                                               | A 1-unit change in temperature z-score was associated with an increase in cryptosporidiosis, lagged by 1 month.                                                                                       | Adjusted for distance from the equator. Sub-analysis found variability in estimates for different climate regions.                                                     | Meta-analysis         | 61 studies                      | 1                        |   |   |    |
| Jagai et al. 2012 | 6 countries in South Asia    | 1976 - 2009 | All ages | Viral     | Temperature z-score (monthly)                        | Monthly rotavirus incidence z-score                                                             | A 1-unit change in temperature z-score was associated with a -0.328 unit change in rotavirus incidence z-score, lagged by one month (95% CI -0.558, -0.098).                                          | Adjusted for distance from the equator. In tropical climates, the negative temperature-rotavirus association was not observed under all model scenarios.               | Meta-analysis         | 39 studies                      | 1                        |   |   |    |

Supplemental Material, Table S1 (continued) – Ambient Temperature

| Reference              | Location            | Period      | Ages     | Pathogen  | Exposure Definition           | Outcome Definition                                                                                                                        | Results/ Conclusion                                                                                                                                                                                                               | Comments                                                                                                                                                              | Data Source                  | Study Size                                                                        | Direction of Association |   |   |    |
|------------------------|---------------------|-------------|----------|-----------|-------------------------------|-------------------------------------------------------------------------------------------------------------------------------------------|-----------------------------------------------------------------------------------------------------------------------------------------------------------------------------------------------------------------------------------|-----------------------------------------------------------------------------------------------------------------------------------------------------------------------|------------------------------|-----------------------------------------------------------------------------------|--------------------------|---|---|----|
|                        |                     |             |          |           |                               |                                                                                                                                           |                                                                                                                                                                                                                                   |                                                                                                                                                                       |                              |                                                                                   | +                        | - | 0 | NA |
| Katsumata et al. 1998  | Surabaya, Indonesia | 1992 - 1993 | All ages | Protozoan | Average temperature (monthly) | Monthly proportion-positive <i>Cryptosporidium</i> stools among people with/ without diarrhea                                             | No clear association between <i>Cryptosporidium</i> and temperature.                                                                                                                                                              | Temperature relatively constant throughout the study period.                                                                                                          | Hospital Study               | 917 patients with diarrhea (26 positive), 1,043 in-patient controls (15 positive) |                          |   |   | 1  |
| Kelly-Hope et al. 2007 | Vietnam             | 1991 - 2001 | All ages | Bacterial | Average temperature (annual)  | Average annual incidence of shigellosis, typhoid and cholera by province from the National Institute of Hygiene and Epidemiology in Hanoi | Significant positive correlation between temperature and typhoid fever, but no association between temperature and Cholera or <i>Shigella</i> in bivariate analysis. Temperature is not included in the final multivariate model. | Same dataset as Kelly-Hope et al., 2008. Temperature measure not clearly defined but because used an annual temperature measure, excluded from quantitative analysis. | Surveillance Records         | 435,037 shigellosis cases; 187,318 typhoid cases; 17,385 cholera cases            | 0                        | 0 | 0 | 1  |
| Kelly-Hope et al. 2008 | Vietnam             | 1991 - 2001 | All ages | Bacterial | Average temperature (monthly) | Monthly incidence of shigellosis, typhoid and cholera by region, dichotomized to high and low periods                                     | Generally warmer in high vs. low incidence periods for all three pathogens, but no estimates of significance reported.                                                                                                            | Same dataset as Kelly-Hope 2007. Sparse information on temperature. Focus on significant rainfall associations.                                                       | Surveillance Records         | 435,037 shigellosis cases; 187,318 typhoid cases; 17,385 cholera cases            |                          |   |   | 1  |
| Kimura et al. 2005     | Kathmandu, Nepal    | 1999 - 2002 | All ages | Protozoan | Average temperature (monthly) | Monthly <i>Cyclospora</i> -positive stools from people with diarrhea                                                                      | Highest percent of positive samples seen in summer (June - August), which is warm and rainy. Few cases in cooler, dry months, with the exception of a high percent positive in December.                                          | Also tested 686 samples from Lao PDR, but only 1 positive. Excluded from analysis. Samples from hospitals, labs and schools.                                          | Hospital and Community Study | 1,397 stool samples, 128 positive                                                 |                          |   |   | 1  |
| Konno et al. 1983      | Yamagata, Japan     | 1974 - 1981 | < 15     | Viral     | Average temperature (monthly) | Proportion of monthly rotavirus-positive stools from pediatric patients with acute diarrhea                                               | Peak of infections observed in coldest months when average 10 day temperatures <5°C. Very little disease when temperatures >20°C.                                                                                                 |                                                                                                                                                                       | Hospital Study               | 1,910 patients, 859 positive                                                      |                          |   |   | 1  |

Supplemental Material, Table S1 (continued) – Ambient Temperature

| Reference          | Location               | Period                         | Ages     | Pathogen  | Exposure Definition                                                                           | Outcome Definition                                                                               | Results/ Conclusion                                                                                                                                                                                                                                             | Comments                                                                                                                                                        | Data Source          | Study Size                                                | Direction of Association |   |   |    |
|--------------------|------------------------|--------------------------------|----------|-----------|-----------------------------------------------------------------------------------------------|--------------------------------------------------------------------------------------------------|-----------------------------------------------------------------------------------------------------------------------------------------------------------------------------------------------------------------------------------------------------------------|-----------------------------------------------------------------------------------------------------------------------------------------------------------------|----------------------|-----------------------------------------------------------|--------------------------|---|---|----|
|                    |                        |                                |          |           |                                                                                               |                                                                                                  |                                                                                                                                                                                                                                                                 |                                                                                                                                                                 |                      |                                                           | +                        | - | 0 | NA |
| Kovats et al. 2004 | 10 countries in Europe | 1983 - 2002; varied by country | All ages | Bacterial | Average temperature (weekly, except Poland (biweekly), Estonia and Slovak Republic (monthly)) | Weekly cases of Salmonellosis, except Poland (biweekly), Estonia and Slovak Republic (monthly)   | Significant positive association between temperature and <i>Salmonella</i> for 7 of 10 countries. Above the common threshold for all countries of 6°C, a 1°C increase in temperature was associated with a 0.3% to a 12.5% increase in <i>Salmonella</i> cases. | No significant association between temperature and <i>Salmonella</i> in Denmark, Estonia and Slovak republic. The latter two countries had monthly resolution.  | Surveillance Records | NA                                                        | 7                        | 3 |   |    |
| Kovats et al. 2005 | 6 countries in Europe  | 1989 - 2002; varied by country | All ages | Bacterial | Average temperature (weekly)                                                                  | Peak week -- the week with the maximum number of <i>Campylobacter</i> cases each year            | The timing of the annual peak in cases was not significantly associated with temperature at a 0-4 week lag.                                                                                                                                                     | Also found warmer mean summer and winter temperatures associated with earlier annual peak in <i>Campylobacter</i> cases. Authors looked at lags up to 29 weeks. | Surveillance Records | ~580,000 cases                                            |                          |   | 1 |    |
| Lake et al. 2005   | England and Wales      | 1989 - 1996                    | All ages | Protozoan | Average temperature (monthly)                                                                 | Monthly rate of reported cryptosporidiosis cases (monthly cases/number of days in the month)     | 1°C increase in preceding month was associated with a 2.09 unit increase in the cryptosporidiosis rate from August to November. No association between temperature and cryptosporidiosis during December-March and April-July.                                  | Analysis was separated into 3 four-month periods.                                                                                                               | Surveillance Records | ~52,000 reported cases                                    | 1                        | 2 |   |    |
| Lama et al. 2004   | Lima, Peru             | 1991 - 1998                    | ≥ 13     | All-cause | Average temperature (monthly)                                                                 | Monthly number of patients in the emergency room for acute diarrhea                              | 1°C increase in mean monthly temperature was associated with an 11.3% increase in the number of acute diarrhea cases when cholera was absent in the community and 20.3% when cholera was present.                                                               |                                                                                                                                                                 | Hospital Records     | ~40,000 acute diarrhea cases                              | 1                        |   |   |    |
| Lee et al. 2012    | Southern Taiwan        | 2002 - 2008                    | Children | Viral     | Average temperature (monthly)                                                                 | Monthly proportion of children with rotavirus among those hospitalized for acute gastroenteritis | Negative correlation between mean temperature and rotavirus ( $r=-0.84$ ).                                                                                                                                                                                      | Also report on non-typhoidal <i>Salmonella</i> , but no analysis of the relationship between temperature and <i>Salmonella</i> .                                | Hospital Records     | 2,040 patient charts reviewed, 541 positive for rotavirus |                          |   | 1 |    |



Supplemental Material, Table S1 (continued) – Ambient Temperature

| Reference                   | Location          | Period                        | Ages     | Pathogen  | Exposure Definition                                                         | Outcome Definition                                                            | Results/ Conclusion                                                                                                                             | Comments                                                                                                           | Data Source          | Study Size                                               | Direction of Association |   |   |    |
|-----------------------------|-------------------|-------------------------------|----------|-----------|-----------------------------------------------------------------------------|-------------------------------------------------------------------------------|-------------------------------------------------------------------------------------------------------------------------------------------------|--------------------------------------------------------------------------------------------------------------------|----------------------|----------------------------------------------------------|--------------------------|---|---|----|
|                             |                   |                               |          |           |                                                                             |                                                                               |                                                                                                                                                 |                                                                                                                    |                      |                                                          | +                        | - | 0 | NA |
| Levy et al. 2009            | Global Tropics    | 1974 - 2005                   | All ages | Viral     | Average temperature (monthly)                                               | Monthly cases of rotavirus                                                    | A 1°C increase in average monthly temperature is associated with a 10% decrease in rotavirus cases in the tropics.                              | Adjusted for autocorrelation.                                                                                      | Meta-analysis        | 26 studies                                               |                          | 1 |   |    |
| Lloyd et al. 2007           | Global            | 1954 - 2000; varied by source | < 5      | All-cause | Mean of average monthly temperature across the study period for each report | Estimates of diarrhea incidence from three diarrhea burden of disease reviews | No significant association between temperature and diarrhea in children under 5.                                                                | Excluded from quantitative analysis because temperature was calculated over several months.                        | Meta-analysis        | 36 studies from 3 published reviews                      |                          | 0 | 1 |    |
| Lopman et al. 2009          | England and Wales | 1993 - 2006                   | All ages | Viral     | Average temperature (daily)                                                 | Daily reported laboratory-confirmed norovirus infections                      | Norovirus reports decreased by 15% for each 1°C average increase in temperature over the preceding 49 days.                                     |                                                                                                                    | Surveillance Records | 35,210 reported cases                                    |                          | 1 |   |    |
| Luque Fernandez et al. 2009 | Lusaka, Zambia    | 2003 - 2006                   | All ages | Bacterial | Maximum temperature (weekly)                                                | Number of cholera cases per week at cholera isolation centers                 | 1°C increase in temperature is associated with a 5% increase in cholera cases 6 weeks later.                                                    | Adjusted for rainfall and autocorrelation. Data collected during three cholera outbreaks.                          | Surveillance Records | ~13,000 cases                                            |                          | 1 |   |    |
| Matsuda et al. 2008         | Dhaka, Bangladesh | 1983 - 2002                   | < 10     | Bacterial | Maximum and minimum temperature (monthly)                                   | Monthly cases of cholera 01                                                   | Cholera cases are negatively associated with maximum temperature 2 months prior and minimum temperature 4 months prior.                         | Adjusted for rainfall and autocorrelation.                                                                         | Hospital Records     | 153,775 cholera cases                                    |                          | 2 |   |    |
| McCormick et al. 2012       | Thailand          | 2003 - 2006                   | All ages | All-cause | Average temperature (monthly)                                               | Monthly incidence of hospitalizations due to acute diarrhea                   | Acute diarrhea positively associated with mean daytime temperature in the current month. The association was strongest in lower income regions. | A model including temperature lags at 0, 9 & 10 months explained 54.4% of the variation in monthly diarrhea cases. | Surveillance Records | NA                                                       |                          | 1 |   |    |
| Mitui et al. 2011           | Hong Kong, China  | 2004 - 2007                   | All ages | Viral     | Average temperature (monthly)                                               | Monthly rotavirus-positive cases                                              | Most rotavirus cases in cooler, winter months (Nov - March).                                                                                    |                                                                                                                    | Hospital Study       | 6,937 patients with diarrhea, 830 positive for rotavirus |                          | 1 |   |    |

Supplemental Material, Table S1 (continued) – Ambient Temperature

| Reference                   | Location                   | Period      | Ages                       | Pathogen  | Exposure Definition                       | Outcome Definition                                                                                                                           | Results/ Conclusion                                                                                                                                                              | Comments                                                                                                                                                                           | Data Source          | Study Size                                      | Direction of Association |   |   |    |
|-----------------------------|----------------------------|-------------|----------------------------|-----------|-------------------------------------------|----------------------------------------------------------------------------------------------------------------------------------------------|----------------------------------------------------------------------------------------------------------------------------------------------------------------------------------|------------------------------------------------------------------------------------------------------------------------------------------------------------------------------------|----------------------|-------------------------------------------------|--------------------------|---|---|----|
|                             |                            |             |                            |           |                                           |                                                                                                                                              |                                                                                                                                                                                  |                                                                                                                                                                                    |                      |                                                 | +                        | - | 0 | NA |
| Naumova et al. 2007         | Massachusetts, USA         | 1992 - 2001 | All ages                   | Multiple  | Average temperature (daily)               | Daily reported lab-confirmed cases of <i>Campylobacter</i> , <i>Salmonella</i> , <i>Shigella</i> , <i>Cryptosporidium</i> and <i>Giardia</i> | Salmonellosis and campylobacteriosis peak with temperature. <i>Shigella</i> , <i>Cryptosporidium</i> , and <i>Giardia</i> peak in the fall, lagging behind the temperature peak. | Authors selected diseases that typically peak in summer or autumn and are water-borne.                                                                                             | Surveillance Records | 45,816 reported cases                           |                          |   |   | 1  |
| Onozuka et al. 2010         | Fukuoka, Japan             | 1999 - 2007 | All ages                   | All-cause | Average temperature (weekly)              | Weekly cases of infectious gastroenteritis in 120 sentinel medical institutions                                                              | For each 1°C weekly mean temperature increase, a 7.7% increase in cases of infectious gastroenteritis was observed.                                                              | Adjusted for seasonality, autoregression, relative humidity, and long-term trends (year).                                                                                          | Surveillance Records | 422,176 reported cases                          |                          |   |   | 1  |
| Paredes-Paredes et al. 2011 | Cuernavaca, Mexico         | 2006 - 2007 | Adults                     | Bacterial | Average temperature (weekly)              | Weekly percent of diarrhea stools positive for pathogenic <i>E. coli</i>                                                                     | Higher incidence of diarrhea and <i>E. coli</i> in summer vs. winter months. Significant relationship between temperature and ETEC, but not EAEC.                                | Enrolled foreign students in summer (May-Aug) and winter (Jan-Feb). Look at 5 different <i>E. coli</i> serotypes but only two formally tested for an association with temperature. | Cohort Study         | 515 people enrolled, 152 stool samples examined |                          |   | 1 | 1  |
| Phukan et al. 2003          | Dibrugarh, Northeast India | 1999 - 2000 | < 5                        | Viral     | Maximum and minimum temperature (monthly) | Monthly incidence of rotavirus diarrhea in hospitalized children with acute diarrhea                                                         | Incidence of rotavirus highest in coolest month.                                                                                                                                 |                                                                                                                                                                                    | Hospital Study       | 202 children, 47 rotavirus positive             |                          |   |   | 1  |
| Pinfold et al. 1991         | Northeast Thailand         | 1982 - 1987 | All ages                   | All-cause | Average temperature (monthly)             | Monthly incidence of all-cause acute diarrhea                                                                                                | Inverse association between monthly average temperature and incidence of all-cause diarrhea.                                                                                     | Diarrhea peaked during dry season and at the beginning of the rainy season. Authors note shift in drinking water sources in rainy vs. dry season.                                  | Surveillance Records |                                                 |                          |   |   | 1  |
| Purohit et al. 1998         | Pune, India                | 1992 - 1996 | < 5                        | Viral     | Minimum temperature (monthly)             | Monthly rotavirus-positive cases in a diarrhea ward                                                                                          | Inverse association between monthly rotavirus-positive cases and monthly minimum temperature.                                                                                    |                                                                                                                                                                                    | Hospital Study       | 2,267 samples, 945 positive                     |                          |   |   | 1  |
| Ram et al. 1990             | Ludhiana, India            | 1984 - 1987 | All ages                   | Bacterial | Maximum and minimum temperature (monthly) | Monthly percent of stool samples positive for enteroinvasive <i>E. Coli</i>                                                                  | Positive association between maximum and minimum temperature and the percent of samples positive for pathogenic <i>E. coli</i> .                                                 |                                                                                                                                                                                    | Hospital Study       | 2,661 samples, 57 positive                      |                          |   | 2 |    |
| Salazar-Lindo et al. 1997   | Lima, Peru                 | 1993 - 1997 | Infants and young children | All-cause | Average temperature (monthly)             | Monthly admissions for diarrhea and dehydration                                                                                              | Positive association between monthly mean temperature and diarrhea admissions.                                                                                                   | High temperatures during El Niño period accompanied by high rates of diarrhea admissions.                                                                                          | Hospital Records     |                                                 |                          |   |   | 1  |

Supplemental Material, Table S1 (continued) – Ambient Temperature

| Reference            | Location                     | Period      | Ages     | Pathogen  | Exposure Definition                        | Outcome Definition                                                                                  | Results/ Conclusion                                                                                                                                                                                                           | Comments                                                                                                                                                             | Data Source          | Study Size                                                              | Direction of Association |   |   |    |
|----------------------|------------------------------|-------------|----------|-----------|--------------------------------------------|-----------------------------------------------------------------------------------------------------|-------------------------------------------------------------------------------------------------------------------------------------------------------------------------------------------------------------------------------|----------------------------------------------------------------------------------------------------------------------------------------------------------------------|----------------------|-------------------------------------------------------------------------|--------------------------|---|---|----|
|                      |                              |             |          |           |                                            |                                                                                                     |                                                                                                                                                                                                                               |                                                                                                                                                                      |                      |                                                                         | +                        | - | 0 | NA |
| Sarkar et al. 2013   | Vellore, South India         | 2002 - 2006 | < 3      | Viral     | Average temperature (weekly)               | Weekly rotavirus incidence                                                                          | Temperature is significantly associated with rotavirus incidence, interaction with humidity.                                                                                                                                  | One of the few papers with non-hospital incidence measure for rotavirus.                                                                                             | Cohort study         | 452 children                                                            | 1                        |   |   |    |
| Seidu et al. 2013    | Northern Ghana               | 2008 - 2009 | All ages | All-cause | Maximum and minimum temperature (biweekly) | 24-hour, self-reported diarrhea incidence recorded during bi-weekly interviews                      | Maximum temperature positively associated with diarrhea in communities that use sludge and negatively associated with diarrhea in communities that do not use sludge. Opposite relationship observed for minimum temperature. | Maximum and minimum temperatures are included in the same model.                                                                                                     | Cohort Study         | 2,664 residents of sludge and non-sludge communities                    | 2                        | 2 |   |    |
| Singh et al. 2001    | Fiji                         | 1978 - 1998 | Infants  | All-cause | Average temperature (monthly)              | Average monthly rate of diarrhea in infants                                                         | Positive association between monthly temperature and diarrhea one month later.                                                                                                                                                | Also found positive association between average annual temperature for a country and the annual rate of diarrhea among people of all ages across 18 Pacific islands. | Surveillance Records | NA                                                                      | 1                        |   |   |    |
| Soenarto et al. 1981 | Yogyakarta, Indonesia        | 1978 - 1979 | < 12     | Viral     | Average temperature (daily)                | Monthly proportion rotavirus-positive stools among children hospitalized with acute gastroenteritis | No association between temperature and rotavirus.                                                                                                                                                                             | Temperature varied little throughout the study period.                                                                                                               | Hospital Study       | 532 patients, including 188 controls and 334 with acute gastroenteritis |                          |   |   | 1  |
| Speelmon et al. 2000 | Lima, Peru                   | 1997 - 1999 | All ages | Bacterial | Average temperature (weekly)               | Weekly cases of cholera reported to the Ministry of Health                                          | Positive correlation between weekly ambient temperature and reported cholera cases ( $r=0.49, p<0.001$ ).                                                                                                                     |                                                                                                                                                                      | Surveillance Records | 1,175 cholera cases                                                     | 1                        |   |   |    |
| Sumi et al. 2013     | Kolkata, India               | 2007 - 2009 | All ages | Viral     | Average temperature (monthly)              | Monthly proportion of patients hospitalized with diarrhea that are rotavirus positive               | Higher proportion of rotavirus-positive samples at lower temperatures.                                                                                                                                                        |                                                                                                                                                                      | Hospital Records     | 2,519 samples                                                           |                          |   |   | 1  |
| Sutra et al. 1990    | Khon Kaen Province, Thailand | 1988 - 1989 | < 5      | All-cause | Average temperature (monthly)              | Monthly number of cases of diarrhea                                                                 | No clear association between monthly mean temperature and monthly diarrhea cases.                                                                                                                                             | Two diarrhea peaks: at the beginning of the rainy season (May-June) and in the cold season (Nov-Jan).                                                                | Cohort Study         | 481 children                                                            |                          |   |   | 1  |

Supplemental Material, Table S1 (continued) – Ambient Temperature

| Reference            | Location                     | Period      | Ages     | Pathogen  | Exposure Definition           | Outcome Definition                                                                                            | Results/ Conclusion                                                                                                                              | Comments                                                                                    | Data Source          | Study Size                                                                        | Direction of Association |   |   |    |   |
|----------------------|------------------------------|-------------|----------|-----------|-------------------------------|---------------------------------------------------------------------------------------------------------------|--------------------------------------------------------------------------------------------------------------------------------------------------|---------------------------------------------------------------------------------------------|----------------------|-----------------------------------------------------------------------------------|--------------------------|---|---|----|---|
|                      |                              |             |          |           |                               |                                                                                                               |                                                                                                                                                  |                                                                                             |                      |                                                                                   | +                        | - | 0 | NA |   |
| Tam et al. 2006      | England                      | 1989 - 1999 | All ages | Bacterial | Average temperature (weekly)  | Weekly reported <i>Campylobacter</i> cases                                                                    | For each 1°C increase in mean weekly temperature, there was a 5% increase in the number of <i>Campylobacter</i> cases up to a threshold of 14°C. | Adjusted for seasonality, long-term trends, public holidays, and relative humidity.         | Surveillance Records | 623,817 cases                                                                     | 1                        |   |   |    |   |
| Torres et al. 1978   | Caracas, Venezuela           | 1975 - 1976 | < 5      | Viral     | Average temperature (monthly) | Monthly proportion rotavirus-positive stools among hospitalized children                                      | Modest negative relationship between monthly temperature and the proportion of samples positive for rotavirus.                                   | Very little variation in monthly mean temperature throughout the study period.              | Hospital Study       | 293 acute gastroenteritis patients, 66 controls hospitalized for other reasons    |                          |   |   |    | 1 |
| Trabelsi et al. 2010 | Coastal Tunisia              | 2000 - 2003 | < 5      | Viral     | Average temperature (monthly) | Monthly rate of rotavirus detection                                                                           | Rotavirus negatively associated with temperature.                                                                                                | Combination of hospital and clinic-based sampling makes the outcome difficult to interpret. | Hospital Study       | 309 stool samples from outpatients with gastroenteritis and hospitalized children |                          |   |   |    | 1 |
| Traerup et al. 2011  | Tanzania                     | 1998 - 2004 | All ages | Bacterial | Maximum temperature (monthly) | Monthly reported cholera cases                                                                                | A 1°C increase in average monthly temperature was associated with a 29% increase in the relative risk of cholera.                                | Also examine relationship between annual temperature and cholera cases                      | Surveillance Records | NA                                                                                |                          |   |   |    | 1 |
| Utsalo et al. 1992   | Calabar, Nigeria             | 1989        | All ages | Bacterial | Average temperature (monthly) | Monthly count of diarrhea outpatients positive for <i>V. cholerae</i> and <i>V. parahemolyticus</i> infection | Positive association between mean monthly temperature and <i>Vibrio</i> spp. diarrhea count.                                                     | Little variation in temperature throughout the study period.                                | Hospital Study       | 881 outpatients with acute diarrhea, 33 with <i>Vibrio</i> infections             |                          |   |   |    | 1 |
| Woodward et al. 1974 | Fort Apache Reservation, USA | 1968 - 1971 | < 3.5    | All-cause | Average temperature (monthly) | Monthly diarrhea attack rate                                                                                  | Highest diarrhea rates at the end of summer. More closely associated with rainfall than temperature.                                             |                                                                                             | Hospital Study       | 741 child charts reviewed, 573 had diarrhea                                       |                          |   |   |    | 1 |
| Workman et al. 2006  | Barbados                     | 2000 - 2003 | All ages | Bacterial | Average temperature (monthly) | Number of <i>Campylobacter</i> cases from stools of those submitted to a public health laboratory             | No association was observed between the incidence of <i>Campylobacter</i> and temperature.                                                       | Type of temperature measure not specified                                                   | Surveillance Records | 78 cases                                                                          |                          |   |   |    | 1 |

Supplemental Material, Table S1 (continued) – Ambient Temperature

| <u>Reference</u>  | <u>Location</u>                    | <u>Period</u> | <u>Ages</u> | <u>Pathogen</u> | <u>Exposure Definition</u>                                               | <u>Outcome Definition</u>                                                                | <u>Results/ Conclusion</u>                                                                                                                                                                                        | <u>Comments</u>                                                                                                                    | <u>Data Source</u>   | <u>Study Size</u>                            | <u>Direction of Association</u> |          |          |           |  |
|-------------------|------------------------------------|---------------|-------------|-----------------|--------------------------------------------------------------------------|------------------------------------------------------------------------------------------|-------------------------------------------------------------------------------------------------------------------------------------------------------------------------------------------------------------------|------------------------------------------------------------------------------------------------------------------------------------|----------------------|----------------------------------------------|---------------------------------|----------|----------|-----------|--|
|                   |                                    |               |             |                 |                                                                          |                                                                                          |                                                                                                                                                                                                                   |                                                                                                                                    |                      |                                              | <u>+</u>                        | <u>-</u> | <u>0</u> | <u>NA</u> |  |
| Zhang et al. 2008 | Jinan, China                       | 1987 - 2000   | All ages    | Bacterial       | Maximum temperature (monthly)                                            | Monthly reported cases of bacillary dysentery                                            | 11% increase in reported bacillary dysentery cases for each 1°C increase in maximum temperature adjusting for seasonality and autocorrelation.                                                                    | Minimum temperature regression results not presented, but authors state results are "very similar" to maximum temperature results. | Surveillance Records | 60,905 bacillary dysentery cases             | 1                               |          |          |           |  |
| Zhang et al. 2010 | Brisbane and Townsville, Australia | 1990 - 2005   | All ages    | Bacterial       | Maximum and minimum temperatures (Brisbane: weekly; Townsville: monthly) | Weekly (Brisbane) and monthly (Townsville) notified cases of <i>Salmonella</i> infection | Weekly and monthly maximum and minimum temperature are positively associated with reported <i>Salmonella</i> cases in Brisbane and Townsville, respectively, after adjusting for rainfall, seasonality, and year. | In text, present % change as absolute value of coefficient rather than exp (coef).                                                 | Surveillance Records | 5,294 cases in Brisbane, 1,170 in Townsville | 4                               |          |          |           |  |

**Supplemental Material, Table S2a: Articles included in the systematic review of the relationship between heavy rainfall and diarrheal diseases—systematically collected datasets. Direction of association columns indicate the number of analyses presented by the authors of the article that resulted in a positive ("+"), negative ("-"), or neutral ("0") association between exposure of interest and outcome, based on statistical analysis. Positive or negative relationships were defined as  $p < 0.05$  or 95% CI did not include the null. "NA" indicates article did not present results of a statistical analysis.**

| Reference            | Location                     | Period      | Ages     | Pathogen  | Exposure Definition                                                                                  | Outcome Definition                                                                                               | Results/ Conclusion                                                                                                                                                                                    | Comments                                                                                                          | Data Source              | Study Size                      | Direction of Association |   |   |    |
|----------------------|------------------------------|-------------|----------|-----------|------------------------------------------------------------------------------------------------------|------------------------------------------------------------------------------------------------------------------|--------------------------------------------------------------------------------------------------------------------------------------------------------------------------------------------------------|-------------------------------------------------------------------------------------------------------------------|--------------------------|---------------------------------|--------------------------|---|---|----|
|                      |                              |             |          |           |                                                                                                      |                                                                                                                  |                                                                                                                                                                                                        |                                                                                                                   |                          |                                 | +                        | - | 0 | NA |
| Adkins et al. 1987   | Manila, Philippines          | 1983 - 1984 | < 50     | Multiple  | Monsoon rains, months with maximum rainfall                                                          | Hospital diarrhea admissions for pathogen specific diarrhea                                                      | Diarrhea rates increased with the onset of the monsoon rains and peaked during the months of maximum rainfall. <i>V. cholerae</i> especially peaked during peak rainfall months.                       | Weather patterns in 1983 were atypical (drought conditions early in the year, rainy season was delayed 2 months). | Case-control study       | 2,908 cases, 576 controls       |                          |   |   | 1  |
| Carlton et al. 2014  | Esmeraldas Province, Ecuador | 2004 - 2007 | All ages | All-cause | 24-hr rainfall exceeding the 90th percentile value (56 mm)                                           | Weekly diarrhea incidence via household survey                                                                   | Heavy rainfall was associated with an increase in diarrhea incidence during dry periods IRR=1.39 (95% CI: 1.03, 1.87) and a decrease during wet periods IRR=0.74 (95% CI: 0.59, 0.92) at a 2-week lag. | Controlled for diarrhea incidence during the week prior, and for village remoteness.                              | Cohort study             | 5,170 individuals ; 19 villages | 1                        | 1 |   |    |
| Chou et al. 2010     | Taiwan                       | 1996 - 2007 | All ages | All-cause | Daily rainfall > 40 mm                                                                               | Monthly incidence of hospital admissions for all-cause diarrhea from National Health Insurance Research database | Association of extreme rainfall days with monthly diarrhea morbidity at a 2-month lag IRR=1.004 (95% CI: 1.000, 1.008).                                                                                | Controlled for maximum temperature (lag 1 month), humidity (no lag), seasonality, and month in final model.       | Health insurance records | 1.2 million cases of diarrhea   | 1                        |   |   |    |
| Curriero et al. 2001 | USA                          | 1948 - 1994 | All ages | All-cause | Extreme rainfall, determined by the highest z-score for each watershed's total monthly precipitation | Waterborne disease outbreak                                                                                      | 51% of outbreaks preceded by precipitation above 90th percentile ( $p=0.002$ ); 68% of outbreaks preceded by precipitation above 80th percentile ( $p=0.001$ ).                                        | Data from EPA Waterborne disease database and National Climatic Data Center.                                      | Surveillance records     | 525 outbreaks                   | 1                        |   |   |    |
| Dewan et al. 2013    | Dhaka, Bangladesh            | 2005 - 2009 | All ages | Bacterial | Monsoon months                                                                                       | Weekly number of typhoid cases admitted to 11 hospitals                                                          | Significant positive association between rainfall above 77mm and typhoid cases at lags of 0-3 weeks. Almost half (45%) of cases occurred during monsoon months.                                        | Also found 4.6% increase in typhoid cases for every 0.1m increase in river level.                                 | Hospital records         | 4,355 typhoid cases             | 1                        |   |   |    |

Supplemental Material, Table S2a (continued) – Heavy Rainfall – systematically collected datasets

| Reference                 | Location           | Period      | Ages     | Pathogen  | Exposure Definition                                                                                                    | Outcome Definition                                                               | Results/ Conclusion                                                                                                                                                                                                                                                              | Comments                                                                                                       | Data Source           | Study Size             | Direction of Association |   |   |    |
|---------------------------|--------------------|-------------|----------|-----------|------------------------------------------------------------------------------------------------------------------------|----------------------------------------------------------------------------------|----------------------------------------------------------------------------------------------------------------------------------------------------------------------------------------------------------------------------------------------------------------------------------|----------------------------------------------------------------------------------------------------------------|-----------------------|------------------------|--------------------------|---|---|----|
|                           |                    |             |          |           |                                                                                                                        |                                                                                  |                                                                                                                                                                                                                                                                                  |                                                                                                                |                       |                        | +                        | - | 0 | NA |
| Drayna et al. 2010        | Wisconsin, USA     | 2002 - 2007 | ≤ 18     | All-cause | Extreme precipitation defined as > 95th percentile rainfall (> 2.54 cm in a 24-hr period or 3.76 cm in a 48-hr period) | Daily emergency department (ED) visits for AGI                                   | No significant difference found between heavy rainfall events and AGI ED visits at lags of 1-7 days.                                                                                                                                                                             | Also found that any rainfall 4 days prior was significantly associated with an 11% increase in AGI visits.     | Hospital records      | 17,357 AGI ED visits   |                          |   | 1 |    |
| Glass et al. 1982         | Matlab, Bangladesh | 1966 - 1980 | All ages | Bacterial | Peak rainfall or the onset of the monsoon                                                                              | Culture-positive cholera among hospital diarrhea cases                           | No observed relationship between peak rainfall or onset of the monsoon with timing of the annual cholera epidemic.                                                                                                                                                               |                                                                                                                | Hospital surveillance | 7,141 cholera patients |                          |   |   | 1  |
| Hashizume et al. 2007     | Dhaka, Bangladesh  | 1996 - 2002 | All ages | All-cause | 10-mm increase or decrease over threshold rainfall value (52mm)                                                        | Weekly number of non-cholera diarrhea patients presenting to ICDDR,B             | Diarrhea cases increased by 5.1% (95% CI: 3.3, 6.8%) and 3.9% (95% CI: 0.6, 7.2%), respectively, for a 10-mm increase and decrease above or below the rainfall threshold (52 mm). High rainfall effect observed at 1-5 weeks; Low-rainfall effect observed at 0 and 10-16 weeks. | Linear threshold model controlled for seasonal and between-year differences, public holidays, and temperature. | Hospital surveillance | 12,182 diarrhea cases  | 1                        | 1 |   |    |
| Hashizume et al. 2008 Epi | Dhaka, Bangladesh  | 1996 - 2002 | All ages | Bacterial | 10-mm increase or decrease over threshold rainfall value (45mm)                                                        | Weekly number of culture-positive cholera patients among hospital diarrhea cases | Cholera cases increased by 14% (95% CI: 10.1, 18.9%) and 24% (95% CI: 11.3, 38.9%), respectively, for a 10-mm increase or decrease above or below the rainfall threshold (45 mm). High rainfall effect observed at 1-5 weeks; Low-rainfall effect observed at 1-16 weeks.        | Linear threshold model controlled for seasonal and between-year differences, public holidays, and temperature. | Hospital surveillance | 3,807 cholera cases    | 1                        | 1 |   |    |

Supplemental Material, Table S2a (continued) – Heavy Rainfall – systematically collected datasets

| <u>Reference</u>    | <u>Location</u>   | <u>Period</u> | <u>Ages</u> | <u>Pathogen</u> | <u>Exposure Definition</u>                                                              | <u>Outcome Definition</u>                                          | <u>Results/ Conclusion</u>                                                                                                                                                 | <u>Comments</u>                                                                                                                                                      | <u>Data Source</u>             | <u>Study Size</u> | <u>Direction of Association</u> |          |          |           |
|---------------------|-------------------|---------------|-------------|-----------------|-----------------------------------------------------------------------------------------|--------------------------------------------------------------------|----------------------------------------------------------------------------------------------------------------------------------------------------------------------------|----------------------------------------------------------------------------------------------------------------------------------------------------------------------|--------------------------------|-------------------|---------------------------------|----------|----------|-----------|
|                     |                   |               |             |                 |                                                                                         |                                                                    |                                                                                                                                                                            |                                                                                                                                                                      |                                |                   | <u>+</u>                        | <u>-</u> | <u>0</u> | <u>NA</u> |
| Nichols et al. 2009 | England and Wales | 1910 - 1999   | All ages    | All-cause       | Rainfall exceeding the upper limit of the 95% reference range 4 weeks prior to outbreak | Drinking-water related outbreaks                                   | Significant association between excess cumulative rainfall in the previous 7 days and outbreaks ( $p=0.001$ ).                                                             | Also found significant association between low rainfall in the previous 2-4 weeks and outbreaks ( $p=0.002$ ).                                                       | Systematic review of outbreaks | 89 outbreaks      | 1                               |          |          |           |
| Said et al. 2003    | England and Wales | 1970 - 2000   | All ages    | All-cause       | Heavy rainfall                                                                          | Outbreaks of private drinking water supplies                       | Heavy rainfall preceded or occurred concurrently with 24% of outbreaks.                                                                                                    |                                                                                                                                                                      | Systematic review of outbreaks | 25 outbreaks      |                                 |          |          | 1         |
| Seidu et al. 2013   | Northern Ghana    | 2008 - 2009   | All ages    | All-cause       | Bi-weekly maximum rainfall                                                              | Diarrhea in the past 24 hours reported during bi-weekly interviews | Maximum rainfall events associated with increased risk of diarrhea in both sludge (RR=1.03; 95% CI: 1.02, 1.05) and non-sludge (RR=1.003; 95% CI: 0.99, 1.01) communities. | Examined farming communities that apply fecal sludge and those that do not.                                                                                          | Cohort Study                   | 2,664 residents   | 2                               |          |          |           |
| Thomas et al. 2006  | Canada            | 1975 - 2001   | All ages    | All-cause       | Maximum 5-day rainfall in a six-week period, as a percentile of the annual average.     | Waterborne disease outbreak                                        | Increased risk of outbreaks following rainfall events above the 93rd percentile (OR= 2.28; 95% CI: 1.22, 4.29).                                                            | Controlled for temperature. Using a step-wise selection procedure, absolute accumulated rainfall and accumulated rainfall days were not retained in the final model. | Analysis of outbreak database  | 92 outbreaks      | 1                               |          |          |           |



Supplemental Material, Table S2b: Articles included in the systematic review of the relationship between heavy rainfall and diarrheal diseases—outbreak reports.

| <u>Reference</u>                          | <u>Location</u>   | <u>Period</u> | <u>Ages</u> | <u>Pathogen</u> | <u>Exposure Definition</u>                                                                                    | <u>Outcome Definition</u>                                                                      | <u>Results/ Conclusions</u>                                                                                                                                                             | <u>Noted Associations with Heavy Rainfall</u>                                                                                                                                                                | <u>Environmental Investigations</u>                                                                                                                                                                                                                                                   | <u>Data Source</u>     | <u>Study Size</u>              |
|-------------------------------------------|-------------------|---------------|-------------|-----------------|---------------------------------------------------------------------------------------------------------------|------------------------------------------------------------------------------------------------|-----------------------------------------------------------------------------------------------------------------------------------------------------------------------------------------|--------------------------------------------------------------------------------------------------------------------------------------------------------------------------------------------------------------|---------------------------------------------------------------------------------------------------------------------------------------------------------------------------------------------------------------------------------------------------------------------------------------|------------------------|--------------------------------|
| Aksoy et al. 2007                         | Western Turkey    | 2005          | All ages    | Protozoan       | Residence in Izmir                                                                                            | Laboratory-confirmed cryptosporidiosis and cyclosporiasis                                      | The suspected source of the outbreak was the public drinking water supply contaminated by sewage or animal waste following heavy rainfall.                                              | Unusually heavy rainfall is thought to have caused contamination of the water supply with sewage.                                                                                                            | Coliform bacteria detected in water tank. No detectable chlorine in water tank.                                                                                                                                                                                                       | Outbreak investigation | 22 cases                       |
| Anderson et al. 2003; Gelting et al. 2005 | Wyoming, USA      | 2001          | All ages    | Viral           | Visiting a mountain lodge                                                                                     | AGI; norovirus                                                                                 | Significant association between water consumption and illness; dose response relationship observed.                                                                                     | Along with infrastructure problems, heavy rains preceding the start of the outbreak helped carry wastewater across bedrock to wells.                                                                         | Well water samples tested positive for fecal coliforms; identical norovirus sequence was isolated from well water and 6 stool samples.                                                                                                                                                | Outbreak investigation | 35 AGI cases                   |
| Atherton et al. 1995                      | Bradford, England | 1992          | All ages    | Protozoan       | Living within or visiting the distribution zone of the suspected plant and consumption of unboiled tap water. | Laboratory-confirmed cryptosporidiosis                                                         | Cases significantly more likely than controls to have consumed unboiled tap water and reside in supply zone, and those drinking larger volumes of water were more likely to become ill. | Heavy rainfall in the catchment area of the reservoir immediately prior to outbreak. Increased turbidity of finished water also noted.                                                                       | <i>Cryptosporidium</i> oocysts detected at the treatment plant and in the distribution system at low concentrations during early stages of the outbreak. Replacement of a sand filter within the waterworks at the time of heavy rains reduced the efficiency of the water treatment. | Outbreak investigation | 125 cases                      |
| Auld et al. 2004; CCDR 2000               | Walkerton, Canada | 2000          | All ages    | Bacterial       | Consumption of Walkerton municipal water                                                                      | Reported gastroenteritis, laboratory-confirmed <i>E. coli</i> O157:H7 and <i>Campylobacter</i> | People residing in homes connected to municipal water supply had 11.7 times higher gastroenteritis risk; dose response relationship observed.                                           | Record high monthly rainfall led to ground saturation, increasing the groundwater contamination risk. Contamination of well water was likely responsible for gross contamination of the distribution system. | Coliform bacteria and <i>E. coli</i> detected in the municipal water distribution system. First documented outbreak of <i>E. coli</i> O157:H7 in a municipal water supply in Canada and the largest recorded multi-bacterial waterborne outbreak in Canada.                           | Outbreak investigation | 1,346 cases of gastroenteritis |

Supplemental Material, Table S2b (continued) – Heavy Rainfall – outbreak reports

| <u>Reference</u>     | <u>Location</u>       | <u>Period</u> | <u>Ages</u> | <u>Pathogen</u> | <u>Exposure Definition</u>                                                                               | <u>Outcome Definition</u>                                                                                             | <u>Results/ Conclusions</u>                                                                                                                                                                                                                                         | <u>Noted Associations with Heavy Rainfall</u>                                                                                                                                                                                                                   | <u>Environmental Investigations</u>                                                                                                                                                                                           | <u>Data Source</u>     | <u>Study Size</u>      |
|----------------------|-----------------------|---------------|-------------|-----------------|----------------------------------------------------------------------------------------------------------|-----------------------------------------------------------------------------------------------------------------------|---------------------------------------------------------------------------------------------------------------------------------------------------------------------------------------------------------------------------------------------------------------------|-----------------------------------------------------------------------------------------------------------------------------------------------------------------------------------------------------------------------------------------------------------------|-------------------------------------------------------------------------------------------------------------------------------------------------------------------------------------------------------------------------------|------------------------|------------------------|
| Bridgman et al. 1995 | Warrington, England   | 1992 - 1993   | All ages    | Protozoan       | Residence in an area supplied by two groundwater sources; drinking unboiled tap water from these sources | Laboratory-confirmed cryptosporidiosis                                                                                | Drinking water from a zone of the distribution system supplied from groundwater sources was significantly associated with cryptosporidiosis.                                                                                                                        | Very heavy rainfall preceding outbreak. One source of water drained surface water directly from a field containing livestock feces, bypassing natural sandstone filtration. Also high turbidity in associated distribution reservoir associated with this zone. | <i>Cryptosporidium</i> oocysts were not detected in the water supply.                                                                                                                                                         | Outbreak investigation | 47 cases               |
| Doyle et al. 2004    | Etang de Thau, France | 2002          | All ages    | Viral           | Consumption of raw oysters from Etang de Thau                                                            | Presence of diarrhea and/or vomiting, or fever or abdominal pains and/or nausea within 72 hours of oyster consumption | Those consuming raw oysters from the supply in question were significantly more likely to experience illness than those not exposed.                                                                                                                                | Unusually heavy rainfall and flooding occurred at the site of oyster harvest immediately prior to the outbreak.                                                                                                                                                 | Reports of overflow of wastewater treatment plants and pumping stations. High levels of <i>E. coli</i> contamination of water and bacteriological contamination of shellfish.                                                 | Outbreak investigation | 69 cases               |
| Effler et al. 2001   | Swaziland             | 1992 - 1993   | > 5         | Bacterial       | Consumption of untreated water or beef consumption, female gender                                        | <i>E. coli</i> O157:NM                                                                                                | Drought, carriage of <i>E. coli</i> O157 by cattle, and heavy rains with contamination of surface water appear to be important factors contributing to this outbreak. Untreated water and beef consumption and female gender was associated with diarrheal illness. | Outbreak of <i>E. coli</i> O157:NM 3 days after first heavy rainfalls following 3 months of drought. 72-75% of monthly rainfall fell in one day.                                                                                                                | <i>E. coli</i> O157 was isolated from water, sewage, cattle, and maize samples. Authors speculate that contamination of scarce water sources by livestock led to outbreak. A 7-fold increase in cattle deaths was also noted. | Outbreak investigation | > 2,868 diarrhea cases |

Supplemental Material, Table S2b (continued) – Heavy Rainfall – outbreak reports

| <u>Reference</u>                       | <u>Location</u>   | <u>Period</u> | <u>Ages</u> | <u>Pathogen</u> | <u>Exposure Definition</u>                                      | <u>Outcome Definition</u>                | <u>Results/ Conclusions</u>                                                                                                                                                                                                                                   | <u>Noted Associations with Heavy Rainfall</u>                                                                                                                                                                        | <u>Environmental Investigations</u>                                                                                                                                                                                                                   | <u>Data Source</u>     | <u>Study Size</u>                                   |
|----------------------------------------|-------------------|---------------|-------------|-----------------|-----------------------------------------------------------------|------------------------------------------|---------------------------------------------------------------------------------------------------------------------------------------------------------------------------------------------------------------------------------------------------------------|----------------------------------------------------------------------------------------------------------------------------------------------------------------------------------------------------------------------|-------------------------------------------------------------------------------------------------------------------------------------------------------------------------------------------------------------------------------------------------------|------------------------|-----------------------------------------------------|
| Fong et al. 2007; O'Reilly et al. 2007 | Ohio, USA         | 2004          | All ages    | Multiple        | Consumption of tap water                                        | Gastroenteritis                          | Significant association between gastroenteritis symptoms and tap water consumption, as well as the amount of tap water consumed. Groundwater contamination was likely caused by transport of microbiological contaminants after extreme precipitation events. | Extreme precipitation events likely raised the water table, saturated the subsurface, and along with very strong Lake Erie currents, forced a surge in water levels and rapid surface water-groundwater interchange. | Municipal wastewater system was functioning properly. Well water was contaminated with multiple microbial pathogens including <i>C. jejuni</i> , <i>Salmonella</i> and <i>Giardia</i> . Contamination caused by fecal contamination of karst aquifer. | Outbreak investigation | 1,450 cases                                         |
| Goodman et al. 1982                    | Georgia, USA      | 1982          | All ages    | Viral           | Homes served by the community water system                      | AGI; Norwalk virus                       | Homes served by the public water system were significantly more likely to have reported AGI than those with private supplies. Four-fold rise in antibody titer to Norwalk virus among patients.                                                               | Approximately 4.5 inches of rainfall over 2 days immediately preceding the outbreak. Surface water from heavy rainfall may have contaminated the system.                                                             | Fecal coliforms detected in spring feeding the community water system. Spring was open to groundwater runoff from nearby homes with septic tanks and animals. A well casing was subjected to flooding by surface water.                               | Outbreak investigation | 59 AGI cases                                        |
| Hejkal et al. 1982                     | Texas, USA        | 1980          | All ages    | Viral           | Central city well water supply                                  | AGI; Hepatitis A                         | The outbreak may have been caused by fecal contamination of groundwater near the central-city wells.                                                                                                                                                          | The outbreak occurred following a period of heavy rainfall. Another outbreak in 1979 in this region was also preceded by heavy rainfall.                                                                             | Hepatitis A virus was detected in sewage and well water, despite sufficient chlorine residual. Rotavirus detected in sewage samples only. No viruses detected in stool samples.                                                                       | Outbreak investigation | Approximately 7,900 AGI cases, 29 hepatitis A cases |
| Ihekweazu et al. 2006                  | Cornwall, England | 2004          | 1-10 years  | Bacterial       | Contact with a freshwater stream flowing across a seaside beach | Laboratory confirmed <i>E. coli</i> O157 | Cases had higher exposure to streams than controls; a dose-response effect was observed.                                                                                                                                                                      | Heavy rainfall in the days preceding the outbreak might have caused feces from the cattle, potentially containing <i>E. coli</i> O157, to contaminate the stream.                                                    | Increased numbers of coliforms were found in the stream prior to the outbreak. Cattle were found grazing upstream.                                                                                                                                    | Outbreak investigation | 7 cases                                             |

Supplemental Material, Table S2b (continued) – Heavy Rainfall – outbreak reports

| <u>Reference</u>                          | <u>Location</u>    | <u>Period</u> | <u>Ages</u> | <u>Pathogen</u> | <u>Exposure Definition</u>                                  | <u>Outcome Definition</u>                                                  | <u>Results/ Conclusions</u>                                                                                                                                                                                                                                                                          | <u>Noted Associations with Heavy Rainfall</u>                                                                                                                                                                                | <u>Environmental Investigations</u>                                                                                                                                                                             | <u>Data Source</u>     | <u>Study Size</u>                            |
|-------------------------------------------|--------------------|---------------|-------------|-----------------|-------------------------------------------------------------|----------------------------------------------------------------------------|------------------------------------------------------------------------------------------------------------------------------------------------------------------------------------------------------------------------------------------------------------------------------------------------------|------------------------------------------------------------------------------------------------------------------------------------------------------------------------------------------------------------------------------|-----------------------------------------------------------------------------------------------------------------------------------------------------------------------------------------------------------------|------------------------|----------------------------------------------|
| Mackenzie et al. 1994; Fox and Lytle 1996 | Wisconsin, USA     | 1993          | All ages    | Protozoan       | Receiving water from the southern Milwaukee treatment plant | Watery diarrhea; cryptosporidiosis                                         | Outbreak was caused by <i>Cryptosporidium</i> oocysts that passed through the filtration system of one of the city's water-treatment plants. The rates of isolation of other enteric pathogens remained stable but there was >100-fold increase in the rate of isolation of <i>Cryptosporidium</i> . | Before the outbreak, severe spring storms caused the lake's turbidity and bacterial counts to rise dramatically. There were marked increases in the turbidity of treated water at the city's southern water-treatment plant. | <i>Cryptosporidium</i> oocysts were identified in water from ice made in southern Milwaukee. Largest U.S. waterborne disease outbreak to date.                                                                  | Outbreak investigation | Estimated 403,000 cases with watery diarrhea |
| Millson et al. 1991                       | Ontario, Canada    | 1985          | All ages    | Bacterial       | Consumption of town water                                   | Vomiting and/or diarrhea; laboratory-confirmed <i>Campylobacter jejuni</i> | Heavy rainfall and detection of well water contamination was followed by an increase in illness. Higher average consumption of town water by <i>C. jejuni</i> cases.                                                                                                                                 | Especially heavy snow accumulation, with a correspondingly heavy spring runoff, accompanied by heavy rainfall. Outbreak attributable to melt water entering municipal wells.                                                 | No environmental sampling reported. Water in the system was not chlorinated because chlorination was not required for deep well systems.                                                                        | Outbreak investigation | 241 AGI cases; 57 <i>C. jejuni</i> cases     |
| Patil et al. 2011                         | Delhi, India       | 2009          | All ages    | All-cause       | Residence in a labor settlement at a construction site      | Acute watery diarrhea                                                      | Well water was the probable source of infection, with contamination occurring as the result of open defecation.                                                                                                                                                                                      | Heavy rains occurred two days prior to the onset of the outbreak.                                                                                                                                                            | 3 of 7 water samples (and 3 of 15 stool samples) were positive for <i>V. cholerae</i> 01.                                                                                                                       | Outbreak investigation | 69 cases                                     |
| Smith et al. 1989                         | Ayrshire, Scotland | 1988          | All ages    | Protozoan       | Residence in Ayrshire                                       | Laboratory-confirmed cryptosporidiosis                                     | Oocyst contamination of a break-pressure tank containing final water for distribution was the cause of the outbreak.                                                                                                                                                                                 | Outbreak was preceded by a period of heavy rainfall. Three very wet days following a dry period.                                                                                                                             | <i>Cryptosporidium</i> oocysts were detected in the chlorinated water supply system. Indicators of fecal contamination detected in the distribution system and neighboring stream near the break-pressure tank. | Outbreak investigation | 27 cases                                     |

Supplemental Material, Table S2b (continued) – Heavy Rainfall – outbreak reports

| <u>Reference</u>     | <u>Location</u>   | <u>Period</u> | <u>Ages</u> | <u>Pathogen</u> | <u>Exposure Definition</u>                                                   | <u>Outcome Definition</u>                                          | <u>Results/ Conclusions</u>                                                                                                                                             | <u>Noted Associations with Heavy Rainfall</u>                                                                                  | <u>Environmental Investigations</u>                                                                                                                                                | <u>Data Source</u>     | <u>Study Size</u>                                       |
|----------------------|-------------------|---------------|-------------|-----------------|------------------------------------------------------------------------------|--------------------------------------------------------------------|-------------------------------------------------------------------------------------------------------------------------------------------------------------------------|--------------------------------------------------------------------------------------------------------------------------------|------------------------------------------------------------------------------------------------------------------------------------------------------------------------------------|------------------------|---------------------------------------------------------|
| Vogt et al. 1982     | Vermont, USA      | 1978          | All ages    | Bacterial       | Consumption of unboiled water from the town water system                     | AGI; <i>Campylobacter jejuni</i>                                   | People who consumed unboiled Bennington water had a significantly higher illness rate than those who consumed water from another source. Dose-response effect observed. | Heavy rainfall occurred several days before the outbreak and subsequent increases in water turbidity were noted.               | No water samples or specimens from wild or domestic animals were positive for <i>Campylobacter</i> . Absence of filtration made it difficult to maintain adequate chlorine levels. | Outbreak investigation | 169 cases out of approximately 1,100 survey respondents |
| Willocks et al. 1998 | North Thames, UK  | 1997          | All ages    | Protozoan       | Consumption of unboiled tap water, and/or water from a water treatment works | Laboratory-confirmed cryptosporidiosis                             | Cases were more likely to have consumed unboiled tap water. Source suspected to be a deep chalk borehole.                                                               | Unusually heavy rains immediately prior to the outbreak followed a period of 2 years of very little rainfall.                  | 19 of 582 water samples tested positive for <i>Cryptosporidium</i> , including the suspected borehole well. The implicated well was next to a cattle farm.                         | Outbreak investigation | 345 cases                                               |
| Yamamoto et al. 2000 | Ogose Town, Japan | 1996          | All ages    | Protozoan       | Town residents and visitors                                                  | Diarrhea, abdominal cramps, and/or lab-confirmed cryptosporidiosis | Outbreak caused by contamination of the town's potable water system by <i>Cryptosporidium</i> oocysts following a high rainfall event after a low rainfall period.      | Low monthly precipitation in May followed by a heavy rainfall event that increased water turbidity. Outbreak occurred in June. | No environmental sampling reported.                                                                                                                                                | Outbreak investigation | 9,140 cases                                             |

**Supplemental Material, Table S3a: Articles included in the systematic review of the relationship between flooding and diarrheal diseases—studies with an explicitly defined comparison group. Direction of association columns indicate the number of analyses presented by the authors of the article that resulted in a positive ("+"), negative ("-"), or neutral ("0") association between exposure of interest and outcome, based on statistical analysis. Positive or negative relationships were defined as  $p < 0.05$  or 95% CI did not include the null. "NA" indicates article did not present results of a statistical analysis.**

| Reference            | Location              | Period      | Ages     | Pathogen  | Exposure Definition                | Outcome Definition                                     | Results/ Conclusion                                                                                                                                                                                                                 | Comments                                                                                                                                        | Data Source          | Study Size                       | Direction of Association |   |   |    |
|----------------------|-----------------------|-------------|----------|-----------|------------------------------------|--------------------------------------------------------|-------------------------------------------------------------------------------------------------------------------------------------------------------------------------------------------------------------------------------------|-------------------------------------------------------------------------------------------------------------------------------------------------|----------------------|----------------------------------|--------------------------|---|---|----|
|                      |                       |             |          |           |                                    |                                                        |                                                                                                                                                                                                                                     |                                                                                                                                                 |                      |                                  | +                        | - | 0 | NA |
| Biswas et al. 1999   | West Bengal, India    | 1993        | All ages | All-cause | Flooding of Hooghly District       | Self-reported diarrhea                                 | The attack rate for diarrhea increased from 4.5% to 17.6% ( $p < 0.01$ ) following the flood.                                                                                                                                       |                                                                                                                                                 | Community survey     | 398 people surveyed              | 1                        |   |   |    |
| Bokhari et al. 2013  | Pakistan              | 2010 - 2011 | > 15     | Bacterial | 2010 and 2011 floods               | Patients with diarrhea-like symptoms                   | Higher proportion of diarrhea cases attributable to pathogenic <i>E. coli</i> in flood-affected areas (56.3%) compared with sporadic cases from non-flood affected areas (12.5%) in the same provinces during similar time periods. | Tested stools from 205 patients from flooded and 400 patients from non-flooded areas.                                                           | Hospital study       | 605 diarrhea patients            |                          |   |   | 1  |
| Campanella 1999      | Villanueva, Nicaragua | 1998        | All ages | All-cause | Flooding caused by Hurricane Mitch | 30-day incidence of diarrhea in the affected region    | Incidence increased by 910 cases/100,000 population from the same month in the previous year ( $p < 0.01$ ).                                                                                                                        |                                                                                                                                                 | Clinic records       | 25,300 residents                 | 1                        |   |   |    |
| CDC 2000             | North Carolina, USA   | 1999        | All ages | All-cause | Flooding caused by Hurricane Floyd | Weekly diarrheal ED visits a month after the hurricane | RR=2.0 (95% CI: 1.4, 2.8) for diarrhea a month after Hurricane Floyd vs. the same period in the prior year.                                                                                                                         | Several rivers flooded and 2.1 million people were estimated to be affected.                                                                    | Hospital records     | 53,398 ED visits                 | 1                        |   |   |    |
| CDC 2005d            | Thailand              | 2004 - 2005 | All ages | All-cause | Flooding caused by a tsunami       | Acute diarrhea reported by medical facilities          | Authors report a 1.7-fold increase in annualized rate of diarrhea relative to the same period in the preceding year, but do not test this association.                                                                              | Reported increase in diarrhea rate is confounded by a shift from passive surveillance to active surveillance immediately following the tsunami. | Surveillance records | 1,237 diarrhea cases             |                          |   |   | 1  |
| Chhotray et al. 2002 | Orissa, India         | 1999        | All ages | All-cause | Cyclone                            | Cases of diarrhea from government surveillance records | 97,934 cases of diarrhea were recorded in the month following the cyclone vs. 551 during the same period in the previous year. Clustering of <i>V. cholerae</i> cases in the worst affected districts.                              | Of 107 stool samples, 79.5% positive for <i>V. cholerae</i> . Cyclone caused severe flooding in coastal areas up to 30km inland.                | Surveillance records | 97,934 diarrhea cases, 81 deaths |                          |   |   | 1  |

Supplemental Material, Table S3a (continued) – Flooding– studies with an explicitly defined comparison group

| Reference                 | Location              | Period           | Ages     | Pathogen  | Exposure Definition                                                                                        | Outcome Definition                                                                        | Results/ Conclusion                                                                                                                                                                                                                                                                                                                                                     | Comments                                                                                                                                                                                                                                                                                                   | Data Source           | Study Size                                                              | Direction of Association |   |   |    |   |
|---------------------------|-----------------------|------------------|----------|-----------|------------------------------------------------------------------------------------------------------------|-------------------------------------------------------------------------------------------|-------------------------------------------------------------------------------------------------------------------------------------------------------------------------------------------------------------------------------------------------------------------------------------------------------------------------------------------------------------------------|------------------------------------------------------------------------------------------------------------------------------------------------------------------------------------------------------------------------------------------------------------------------------------------------------------|-----------------------|-------------------------------------------------------------------------|--------------------------|---|---|----|---|
|                           |                       |                  |          |           |                                                                                                            |                                                                                           |                                                                                                                                                                                                                                                                                                                                                                         |                                                                                                                                                                                                                                                                                                            |                       |                                                                         | +                        | - | 0 | NA |   |
| Ding et al. 2013          | Anhui Province, China | 2007             | All ages | All-cause | Flooding periods as defined by the categorization of the Chinese State Science and Technology Commission   | Daily cases of diarrhea obtained from the National Notifiable Disease Surveillance System | Positive association between flooding days and incidence of diarrhea in both Fuyang (OR=3.18; 95% CI 1.13, 8.95) and Bozhou (OR=6.75; 95% CI 1.95, 23.34).                                                                                                                                                                                                              | Different climate variables and lags were implemented for the final models in each of the villages.                                                                                                                                                                                                        | Surveillance records  | 197 diarrhea cases                                                      | 2                        |   |   |    |   |
| Harris et al. 2008        | Dhaka, Bangladesh     | 1998, 2004, 2007 | All ages | Multiple  | Flooding defined as the earliest and latest dates that any of the rivers around Dhaka exceeded flood stage | Diarrhea visits and pathogen-specific diarrhea at ICDDR,B                                 | Diarrhea visits increased during the 2007 flood vs. non-flood months and were 2-3 times higher in flood years vs. non-flood years, although these differences were not evaluated statistically. <i>V. cholerae</i> was the most common cause of diarrhea during flood years. Rotavirus was a more common cause of diarrhea in non-flood years.                          | Data overlaps with Schwartz et al. 2006; also compared counts of pathogens between flood and pre-flood years.                                                                                                                                                                                              | Hospital surveillance | 3,864 diarrhea cases                                                    |                          |   |   |    | 1 |
| Hashizume et al. 2008 JWH | Dhaka, Bangladesh     | 1996 - 2001      | All ages | Multiple  | Flooding defined as the period that the Brigonga River exceeded the flood danger level                     | Cholera and non-cholera diarrhea cases presenting at ICDDR,B                              | Cholera and non-cholera diarrhea increased during floods and in post-flood periods. Observed to expected ratio for cholera during flood period 5.9 (95% CI: 5.0, 7.0); cholera during post-flood period: 2.1 (95% CI: 1.9, 2.4); non-cholera diarrhea during flood period 1.8 (95% CI: 1.6, 1.9); non-cholera diarrhea during post-flood period 1.2 (95% CI: 1.1, 1.3). | Higher risk of flood-related cholera and non-cholera diarrhea in lower hygiene and sanitation groups, and non-cholera diarrhea in lower SES groups, in the post-flood period. Controlled for seasonality and temperature. Compared flood and post-flood periods to the two preceding and subsequent years. | Hospital surveillance | 772 cholera cases, 1,545 non-cholera diarrhea cases during flood period | 4                        |   |   |    |   |

Supplemental Material, Table S3a (continued) – Flooding– studies with an explicitly defined comparison group

| Reference             | Location             | Period      | Ages     | Pathogen  | Exposure Definition                                     | Outcome Definition                                                       | Results/ Conclusion                                                                                                                                                                                        | Comments                                                                                                                                                                                                                                           | Data Source                                 | Study Size                                | Direction of Association |   |   |    |
|-----------------------|----------------------|-------------|----------|-----------|---------------------------------------------------------|--------------------------------------------------------------------------|------------------------------------------------------------------------------------------------------------------------------------------------------------------------------------------------------------|----------------------------------------------------------------------------------------------------------------------------------------------------------------------------------------------------------------------------------------------------|---------------------------------------------|-------------------------------------------|--------------------------|---|---|----|
|                       |                      |             |          |           |                                                         |                                                                          |                                                                                                                                                                                                            |                                                                                                                                                                                                                                                    |                                             |                                           | +                        | - | 0 | NA |
| Joshi et al. 2011     | Uttar Pradesh, India | 2009        | < 5      | All-cause | Flood exposed residents during the 2007 and 2008 floods | Self-reported diarrhea                                                   | The prevalence of diarrhea was 55.1% among the flood exposed group. No difference between flood-exposed and unexposed groups.                                                                              | No test of association was performed between the flood exposed and unexposed groups. The survey of diarrhea prevalence was conducted the year following the exposure.                                                                              | Community survey                            | 807 survey respondents                    |                          |   |   | 1  |
| Katsumata et al. 1998 | Surabaya, Indonesia  | 1992-1993   | All ages | Protozoan | Presence of flooding in rainy season                    | Laboratory-confirmed cases of cryptosporidiosis among study participants | Self-reported exposure to floods was associated with <i>Cryptosporidium</i> infection (OR = 3.08; 95% CI 1.94, 4.91).                                                                                      | Controlled for age, sex, season, contact with cats, rain, crowding, water treatment, public bathing, number of rooms in household, and living area. Also found higher prevalence of cryptosporidiosis during the rainy season in a hospital study. | Cross-sectional study                       | 4,368 study participants                  | 1                        |   |   |    |
| Kondo et al. 2002     | Gaza, Mozambique     | 2000        | All ages | All-cause | Living in a flood-affected community                    | Patients presenting at a clinic or hospital with diarrhea                | The incidence of diarrhea was 2-4 times greater at Hokwe Health Post and the number of patients in Chokwe District Hospital with diarrhea increased eight-fold compared to the same period in other years. | Largest flood in Mozambique in 50 years; 48 deaths and 800,000 evacuees.                                                                                                                                                                           | Hospital and clinic records                 | 339 diarrhea patients                     |                          |   |   | 1  |
| Miettinen et al. 2001 | Finland              | 1998 - 1999 | All ages | All-cause | Floods and surface runoff                               | Waterborne disease outbreaks                                             | The most common causes of waterborne disease outbreaks were floods and surface runoff.                                                                                                                     | Most outbreaks occurred in small groundwater systems.                                                                                                                                                                                              | Surveillance records                        | 14 outbreaks; ~7,300 illnesses registered |                          |   |   | 1  |
| Milojevic et al. 2012 | Matlab, Bangladesh   | 2001-2007   | All ages | All-cause | Self-reported flooding in the bari                      | Patients admitted to health care centers with diarrhea                   | No significant elevated risk among flooded vs. non-flooded residences during the flooding period following adjustment for pre-flood levels and season.                                                     | Multiple reported estimates for flooding during the post-flood period and for flooding in the absence of bari-level data.                                                                                                                          | Hospital surveillance and community surveys | 211,000 residents                         |                          |   |   | 1  |



Supplemental Material, Table S3a (continued) – Flooding– studies with an explicitly defined comparison group

| Reference              | Location                              | Period           | Ages     | Pathogen  | Exposure Definition                                                                                                                         | Outcome Definition                                                                                                                              | Results/ Conclusion                                                                                                                                                                                                                                                        | Comments                                                                                                                                                                                | Data Source              | Study Size                                  | Direction of Association |   |   |    |
|------------------------|---------------------------------------|------------------|----------|-----------|---------------------------------------------------------------------------------------------------------------------------------------------|-------------------------------------------------------------------------------------------------------------------------------------------------|----------------------------------------------------------------------------------------------------------------------------------------------------------------------------------------------------------------------------------------------------------------------------|-----------------------------------------------------------------------------------------------------------------------------------------------------------------------------------------|--------------------------|---------------------------------------------|--------------------------|---|---|----|
|                        |                                       |                  |          |           |                                                                                                                                             |                                                                                                                                                 |                                                                                                                                                                                                                                                                            |                                                                                                                                                                                         |                          |                                             | +                        | - | 0 | NA |
| Mondal et al. 2001     | Midnapur District, West Bengal, India | 1998             | All ages | All-cause | Flood prone homes                                                                                                                           | Self-reported diarrhea in household (2-week recall)                                                                                             | Significantly higher rates of diarrhea in flood-prone homes during flood period vs. pre-flood period and vs. control homes during flood period.                                                                                                                            | No modification of effect by water source, method of water storage, or hygiene practices.                                                                                               | Community survey         | 899 residents                               | 2                        |   |   |    |
| Reacher et al. 2004    | Lewes, England                        | 2000             | All ages | All-cause | Flooding in home                                                                                                                            | Self-reported gastroenteritis                                                                                                                   | Positive but not significant association between flooding and gastroenteritis: RR=1.7 (95% CI: 0.9, 3.0). Significant increase in gastroenteritis by flood depth (test for trend $p=0.04$ ).                                                                               | Phone surveys of flooding victims conducted 9 months after the flood date.                                                                                                              | Community survey         | 467 residents in 207 households             | 1                        |   | 1 |    |
| Schnitzler et al. 2007 | Germany                               | 2002             | ≥ 18     | All-cause | Dermal contact with floodwater and flooding in the home                                                                                     | Self-reported diarrhea                                                                                                                          | Dermal contact with floodwater was significantly associated with diarrhea (OR: 4.6; 95% CI: 1.1, 19.5), but flooding inside the home was not (OR: 1.2; 95% CI: 0.6, 2.6).                                                                                                  | 91% of respondents' homes flooded. 78% had contact with floodwaters.                                                                                                                    | Community survey         | 477 survey respondents                      | 1                        |   | 1 |    |
| Schwartz et al. 2006   | Dhaka, Bangladesh                     | 1988, 1998, 2004 | All ages | All-cause | Flooding, defined by the earliest and latest dates that any of the rivers reached or dropped below pre-determined flood stage, respectively | Flood-related diarrheal epidemics defined as periods when diarrhea visits exceeded the 90th percentile of the prior and subsequent year average | The average number of diarrhea cases per day more than doubled during flood-related epidemic periods ( $p<0.001$ ). <i>V. cholerae</i> played a primary role in flood-related diarrheal epidemics, but other pathogens, particularly ETEC and rotavirus, also contributed. | Data overlaps with Harris et al. 2008. Individuals presenting during flood periods were older, more severely dehydrated, and of lower SES. Authors present data stratified by pathogen. | Hospital surveillance    | 2,229 patients during flood-related periods | 1                        |   |   |    |
| Setzer and Domino 2004 | North Carolina, USA                   | 1998 - 2000      | All ages | Multiple  | Areas severely affected by Hurricane Floyd                                                                                                  | Monthly Medicaid outpatient visits for <i>Cryptosporidium</i> , <i>Giardia</i> , and Adenovirus                                                 | A significant increase in outpatient visits for ill-defined intestinal infections and adenovirus was seen in severely affected counties compared to unaffected counties, but no difference for <i>Giardia</i> or <i>Cryptosporidium</i> .                                  | Study focused on counties with high concentrations of hog farming.                                                                                                                      | Health insurance records | 52,592 outpatient visits                    | 2                        |   |   | 2  |

Supplemental Material, Table S3a (continued) – Flooding– studies with an explicitly defined comparison group

| Reference            | Location                     | Period      | Ages     | Pathogen  | Exposure Definition                                                                                                       | Outcome Definition                                                      | Results/ Conclusion                                                                                                                                                                                | Comments                                                                                                                                                         | Data Source            | Study Size                       | Direction of Association |   |   |    |
|----------------------|------------------------------|-------------|----------|-----------|---------------------------------------------------------------------------------------------------------------------------|-------------------------------------------------------------------------|----------------------------------------------------------------------------------------------------------------------------------------------------------------------------------------------------|------------------------------------------------------------------------------------------------------------------------------------------------------------------|------------------------|----------------------------------|--------------------------|---|---|----|
|                      |                              |             |          |           |                                                                                                                           |                                                                         |                                                                                                                                                                                                    |                                                                                                                                                                  |                        |                                  | +                        | - | 0 | NA |
| Siddique et al. 1989 | Sandwip, Bangladesh          | 1985        | All ages | All-cause | Flooding caused by a cyclone-associated tidal surge                                                                       | Patient with diarrhea at any clinic or reported by field health workers | Cholera outbreak occurred 1 week after cyclone and tidal surge. Dominant agent of the outbreak was El Tor biotype of <i>V. cholerae</i> 01.                                                        | In the 4 weeks preceding the cyclone, 256 cases of diarrhea were reported. In the 2 weeks after the cyclone, 2,767 cases of diarrhea were reported.              | Outbreak investigation | 12,194 diarrhea cases; 51 deaths |                          |   |   | 1  |
| Sur et al. 2000      | West Bengal, India           | 1998        | All ages | Bacterial | Flooding of two rivers                                                                                                    | Diarrhea                                                                | Elevated number of cases observed following the flooding event compared to the same time period in previous two years. 72% of 29 rectal swabs positive for <i>V. cholerae</i> .                    | Cholera outbreak occurred after a severe flood. Outbreak began once floodwaters started to recede.                                                               | Outbreak investigation | 16,590 cases; 276 deaths         |                          |   |   | 1  |
| Vollaard et al. 2004 | Jakarta, Indonesia           | 2001 - 2003 | All ages | Bacterial | Inundation of the participant's household within preceding 12 months                                                      | Laboratory-confirmed <i>S. typhi</i> infection                          | Exposure to flooding was more common in cases than community controls in multivariate analysis: <i>S. typhi</i> : OR=1.65 (95% CI 0.88, 3.08); <i>S. paratyphi</i> : OR=4.52 (95% CI 1.90, 10.73). | Controlled for handwashing with soap, sharing food, toilet in home, recent typhoid case in home, age, eating food from street vendors, use of ice, and crowding. | Case-control study     | 93 cases, 378 community controls | 1                        |   | 1 |    |
| Wade et al. 2004     | Mississippi River Basin, USA | 2001        | All ages | All-cause | Period during which Mississippi River was above the 15-foot flood stage and 1 week after flood recession below this stage | Self-reported Highly Credible Gastrointestinal Illness (HCGI)           | Increased incidence of HCGI during flood period vs. non-flood period (IRR=1.29; 95%CI 1.06, 1.58). Similar but weaker association of diarrhea (IRR=1.23; 95% CI 0.94, 1.62).                       | Flooding in the house or yard, but no other specific exposures, was significantly associated with increased gastrointestinal illness.                            | Cohort study           | 1,110 cohort subjects            |                          |   | 1 |    |
| Waring et al. 2005   | Houston, Texas, USA          | 2001        | All ages | All-cause | Self-reported flooding in the home                                                                                        | Self-reported diarrhea                                                  | More diarrhea reported in flooded households than non-flooded households (OR=10.8; 95% CI 1.5, 8.3).                                                                                               | Confidence interval is inconsistent with the estimate, though both table and text describe the association as significant.                                       | Community survey       | 420 households                   |                          |   |   | 1  |

Supplemental Material, Table S3a (continued) – Flooding– studies with an explicitly defined comparison group

| <u>Reference</u>     | <u>Location</u> | <u>Period</u> | <u>Ages</u> | <u>Pathogen</u> | <u>Exposure Definition</u>        | <u>Outcome Definition</u>                                          | <u>Results/ Conclusion</u>                                                                                                                                          | <u>Comments</u> | <u>Data Source</u>          | <u>Study Size</u>     | <u>Direction of Association</u> |          |          |           |
|----------------------|-----------------|---------------|-------------|-----------------|-----------------------------------|--------------------------------------------------------------------|---------------------------------------------------------------------------------------------------------------------------------------------------------------------|-----------------|-----------------------------|-----------------------|---------------------------------|----------|----------|-----------|
|                      |                 |               |             |                 |                                   |                                                                    |                                                                                                                                                                     |                 |                             |                       | <u>+</u>                        | <u>-</u> | <u>0</u> | <u>NA</u> |
| Woodruff et al. 1990 | Khartoum, Sudan | 1988          | All ages    | All-cause       | Flooding caused by heavy rainfall | People with diarrhea reporting to sentinel surveillance facilities | Diarrhea cases increased compared to pre-flood period and same time period the previous year. Diarrheal disease accounted for the greatest number of clinic visits. |                 | Hospital and clinic records | 10,142 diarrhea cases |                                 |          |          | 1         |

**Supplemental Material, Table S3b: Articles included in the systematic review of the relationship between flooding and diarrheal diseases—outbreak reports.**

| <u>Reference</u>      | <u>Location</u>                                   | <u>Period</u> | <u>Ages</u>   | <u>Pathogen</u> | <u>Exposure Definition</u>                                  | <u>Outcome Definition</u>                                            | <u>Results/ Conclusion</u>                                                                                                                                                                                                 | <u>Comments</u>                                                                                                                                             | <u>Data Source</u>     | <u>Study Size</u>                         |
|-----------------------|---------------------------------------------------|---------------|---------------|-----------------|-------------------------------------------------------------|----------------------------------------------------------------------|----------------------------------------------------------------------------------------------------------------------------------------------------------------------------------------------------------------------------|-------------------------------------------------------------------------------------------------------------------------------------------------------------|------------------------|-------------------------------------------|
| Ahmed et al. 1991     | Bangladesh                                        | 1988 - 1989   | All ages      | Viral           | Widespread flooding as a consequence of heavy monsoon rains | Hospital patients with laboratory-confirmed rotavirus                | Increase in diarrhea cases, proportion of rotavirus diarrhea, rotavirus in older children, percentage of mixed rotavirus infection cases, and an abrupt change in epidemic strains coincided with the spread of the flood. | Unusually heavy monsoon led to widespread flooding. Increased cases coincided with flooding, not rainfall.                                                  | Hospital study         | 298 rotavirus cases                       |
| Ahmed et al. 2011     | Rajanpur District, Pakistan                       | 2010          | All ages      | All-cause       | Flood-affected areas                                        | Diarrhea cases                                                       | 30% of clinical visits for infectious disease were for diarrhea.                                                                                                                                                           | Interviewed flood victims at relief camp clinic.                                                                                                            | Relief camp survey     | 7,814 flood affected persons              |
| Bhunia and Ghosh 2011 | West Bengal, India                                | 2009          | All ages; > 5 | All-cause       | Cyclone Aila; Drinking non-chlorinated piped water          | Hospital admissions for acute watery diarrhea and severe dehydration | Following the Cyclone 1,076 cases were admitted; Drinking from the unchlorinated, piped water supply was significantly associated with acute, watery diarrhea admission.                                                   | The piped water supply for Gosaba block was broken during the cyclone and contaminated by subsequent flooding. Coliforms were detected in the water supply. | Outbreak investigation | 1,076 cases                               |
| Bingnan et al. 1991   | Matlab, Bangladesh                                | 1987 - 1989   | All ages      | Viral           | Major flooding                                              | Hospital patients with laboratory-confirmed rotavirus                | A peak in the proportion of stools positive for rotavirus coincided with a major flood.                                                                                                                                    | Rotavirus diarrhea declined immediately after the flood, whereas diarrhea attributable to other causes remained high.                                       | Hospital surveillance  | 5,811 diarrhea cases, 898 with rotavirus  |
| CDC 2005a             | Louisiana, Mississippi, Tennessee, and Texas, USA | 2005          | All ages      | Multiple        | Hurricane Katrina evacuees                                  | Diarrhea reported at evacuation centers                              | Diarrhea clusters reported in evacuation camps in multiple states. Pathogens detected included norovirus and <i>Salmonella</i> .                                                                                           | Three weeks after the initial displacement caused by Katrina, few diarrhea cases reported.                                                                  | Outbreak investigation | Not stated                                |
| CDC 2005b             | Texas, USA                                        | 2005          | All ages      | Viral           | Hurricane Katrina evacuees                                  | Patients visiting relief clinics with AGI                            | 18% of visits to relief clinics were for AGI. Norovirus was confirmed in 50% of the 44 specimens tested.                                                                                                                   |                                                                                                                                                             | Outbreak investigation | 1,169 AGI cases                           |
| CDC 2005c             | Louisiana, USA                                    | 2005          | All ages      | All-cause       | Persons living in and around 4 parishes in New Orleans      | Diarrhea                                                             | 3.5% of hospital and clinic visits were for diarrhea.                                                                                                                                                                      | Cases detected by an active surveillance system that included hospital and clinics.                                                                         | Surveillance report    | 146 diarrhea cases                        |
| CDC 2012              | Pakistan                                          | 2010          | All ages      | All-cause       | Severe flooding                                             | Diarrhea reports to the Disease Early Warning System (DEWS)          | 13.3% of disease reports to DEWS were for diarrhea. 88.5% of outbreaks were for acute watery diarrhea (AWD) (suspected cholera).                                                                                           |                                                                                                                                                             | Surveillance report    | 745,532 diarrhea cases; 115 AWD outbreaks |

Supplemental Material, Table S3b (continued) – Flooding– outbreak reports

| <u>Reference</u>               | <u>Location</u>          | <u>Period</u> | <u>Ages</u> | <u>Pathogen</u> | <u>Exposure Definition</u>                         | <u>Outcome Definition</u>                                          | <u>Results/ Conclusion</u>                                                                                                                                                                                                   | <u>Comments</u>                                                                                                                                                                        | <u>Data Source</u>     | <u>Study Size</u>                          |
|--------------------------------|--------------------------|---------------|-------------|-----------------|----------------------------------------------------|--------------------------------------------------------------------|------------------------------------------------------------------------------------------------------------------------------------------------------------------------------------------------------------------------------|----------------------------------------------------------------------------------------------------------------------------------------------------------------------------------------|------------------------|--------------------------------------------|
| Kukkula et al. 1997            | Noormarkku, Finland      | 1994          | All ages    | Viral           | Spring flooding caused by abnormal winter snowfall | Gastroenteritis                                                    | Record high spring flooding caused backflow to a groundwater well, contaminating the municipal water supply. Microbiological testing implicated Norwalk virus as the main cause of the outbreak.                             | 25-50% of the population had symptomatic acute gastroenteritis.                                                                                                                        | Outbreak investigation | ~2,500 cases                               |
| Kunii et al. 2002              | Bangladesh               | 1998          | All ages    | All-cause       | Residence in flood-affected district               | Self-reported diarrhea                                             | 26.6% of individuals reported diarrhea (new or exacerbated) during the flood.                                                                                                                                                | The 1998 flood affected over 30 million people, and was longer and more extreme than most in recent history in Bangladesh.                                                             | Community survey       | 517 survey respondents                     |
| Paul et al. 2011               | Bangladesh               | 2008          | All ages    | All-cause       | Exposure to flooding resulting from Cyclone Sidr   | Self-reported diarrhea in the 3-month period following the cyclone | Post-cyclone incidence of water-borne and other diseases was not unusually high. Diarrhea rate: 1.4%.                                                                                                                        | A major outbreak of diseases may have been avoided because of the proper distribution of food and safe drinking water, and timely implementation of health care intervention measures. | Community survey       | 277 households surveyed; 1,443 individuals |
| Qadri et al. 2005              | Dhaka, Bangladesh        | 2004          | All ages    | Bacterial       | Extreme flooding                                   | Patients with diarrhea presenting to ICDDR,B                       | Diarrhea epidemic occurred following extreme floods. Suspect floodwater contaminated with sewage may have led to ETEC spread.                                                                                                | 22% of 350 stool samples tested were positive for <i>V. cholerae</i> 01 and 18% were positive for ETEC.                                                                                | Outbreak investigation | > 17,000 diarrhea cases                    |
| Schmid et al. 2005             | Salzburg, Austria        | 2005          | All ages    | Viral           | Exposure to floodwaters                            | Diarrhea or vomiting                                               | Results of the investigation indicated that exposure to sewage contaminated floodwaters inside a hotel resulted in a norovirus outbreak among the group.                                                                     |                                                                                                                                                                                        | Outbreak investigation | 49 cases                                   |
| Siddique et al. 1991           | Sandwip, Bangladesh      | 1988          | All ages    | All-cause       | Major flooding                                     | Diarrhea and watery diarrhea at relief clinics                     | Diarrhea was the most common illness seen at post-flood relief clinics (34.7% of patients). Watery diarrhea was the most common type of diarrhea (47%) and the most common cause of death for all age groups < 45 years old. |                                                                                                                                                                                        | Relief clinic records  | 46,740 patient visits                      |
| World Health Organization 2005 | Aceh Province, Indonesia | 2004 - 2005   | All ages    | All-cause       | Flooding caused by large tsunami                   | Diarrhea cases                                                     | 24.7% of relief clinic patients were seen for acute watery diarrhea or bloody diarrhea. 11 bloody diarrhea and 1 acute watery diarrhea outbreaks reported.                                                                   |                                                                                                                                                                                        | Surveillance report    | 10,059 diarrhea cases                      |

**Supplemental Material, Table S4: Articles included in the systematic review of the relationship between drought and diarrheal diseases. Direction of association columns indicate the number of analyses presented by the authors of the article that resulted in a positive ("+"), negative ("-"), or neutral ("0") association between exposure of interest and outcome, based on statistical analysis. Positive or negative relationships were defined as  $p < 0.05$  or 95% CI did not include the null. "NA" indicates article did not present results of a statistical analysis.**

| Reference          | Location  | Period      | Ages | Pathogen  | Exposure Definition                                                                                      | Outcome Definition                                                          | Results/ Conclusion                                                                                                                                 | Comments                                                                                           | Data Source                                  | Study Size                     | Direction of Association |   |   |    |
|--------------------|-----------|-------------|------|-----------|----------------------------------------------------------------------------------------------------------|-----------------------------------------------------------------------------|-----------------------------------------------------------------------------------------------------------------------------------------------------|----------------------------------------------------------------------------------------------------|----------------------------------------------|--------------------------------|--------------------------|---|---|----|
|                    |           |             |      |           |                                                                                                          |                                                                             |                                                                                                                                                     |                                                                                                    |                                              |                                | +                        | - | 0 | NA |
| Burr et al. 1978   | Wales, UK | 1978        | < 18 | All-cause | Drought-induced water restrictions                                                                       | Weekly counts of diarrhea or vomiting                                       | Positive dose response relationship between hours of daily water restrictions and counts of diarrhea and vomiting.                                  | Diarrhea reporting completed by head teachers. Restrictions lifted in 2nd week of data collection. | Community Survey                             | 55,000 students in 291 schools | 1                        |   |   |    |
| de Sherbinin 2011  | Africa    | 1992 - 2002 | < 18 | All-cause | Number of droughts occurring 1980-2000, defined as precipitation < 75% of the median for $\geq$ 3 months | Proportion of children with diarrhea in the 2 weeks preceding the interview | No significant correlation between diarrhea and drought.                                                                                            | Diarrhea was not the primary dependent variable for analysis.                                      | Secondary data analysis of community surveys | NA                             |                          | 1 |   |    |
| Effler et al. 2001 | Swaziland | 1992 - 1993 | > 5  | Bacterial | Severe drought for 3 months and subsequent heavy rainfall                                                | <i>E. coli</i> O157:NM and cholera                                          | Outbreak of <i>E. coli</i> began 3 days after onset of rains. Authors speculate contamination of scarce water sources by livestock led to outbreak. | Outbreak accompanied by a seven-fold increase in cattle deaths.                                    | Outbreak Investigation                       | >2,868 diarrhea cases          |                          |   |   | 1  |

**Table S5.** Summary of quantitative associations between diarrhea and drought, flooding, heavy rainfall and temperature reported in 67 articles with quantitative estimates.

|                       | Papers | Analyses | Positive | Negative | Neutral  |
|-----------------------|--------|----------|----------|----------|----------|
| <b>Temperature</b>    | 45     | 82       | 53 (65%) | 16 (20%) | 13 (16%) |
| All-cause             | 11     | 16       | 11 (69%) | 3 (19%)  | 2 (13%)  |
| Bacterial             | 21     | 47       | 37 (79%) | 3 (6%)   | 7 (15%)  |
| Protozoan             | 3      | 5        | 3 (60%)  | 0 (0%)   | 2 (40%)  |
| Viral                 | 10     | 14       | 2 (14%)  | 10 (71%) | 2 (14%)  |
| <b>Flooding</b>       | 14     | 25       | 19 (76%) | 0 (0%)   | 6 (24%)  |
| All-cause             | 12     | 17       | 14 (82%) | 0 (0%)   | 3 (18%)  |
| Bacterial             | 2      | 4        | 3 (75%)  | 0 (0%)   | 1 (25%)  |
| Protozoan             | 2      | 3        | 1 (33%)  | 0 (0%)   | 2 (67%)  |
| Viral                 | 1      | 1        | 1 (100%) | 0 (0%)   | 0 (0%)   |
| <b>Heavy rainfall</b> | 10     | 14       | 10 (71%) | 3 (21%)  | 1 (7%)   |
| All-cause             | 8      | 11       | 8 (73%)  | 2 (18%)  | 1 (9%)   |
| Bacterial             | 2      | 3        | 2 (67%)  | 1 (33%)  | 0 (0%)   |
| Protozoan             | 0      | --       | --       | --       | --       |
| Viral                 | 0      | --       | --       | --       | --       |
| <b>Drought</b>        | 2      | 2        | 1 (50%)  | 0 (0%)   | 1 (50%)  |
| All-cause             | 2      | 2        | 1 (50%)  | 0 (0%)   | 1 (50%)  |
| Bacterial             | 0      | --       | --       | --       | --       |
| Protozoan             | 0      | --       | --       | --       | --       |
| Viral                 | 0      | --       | --       | --       | --       |

**Table S5.** Summary of quantitative associations between diarrhea and drought, flooding, heavy rainfall and temperature reported in 67 articles with quantitative estimates.

|                       | Papers | Analyses | Positive | Negative | Neutral  |
|-----------------------|--------|----------|----------|----------|----------|
| <b>Temperature</b>    | 45     | 82       | 53 (65%) | 16 (20%) | 13 (16%) |
| All-cause             | 11     | 16       | 11 (69%) | 3 (19%)  | 2 (13%)  |
| Bacterial             | 21     | 47       | 37 (79%) | 3 (6%)   | 7 (15%)  |
| Protozoan             | 3      | 5        | 3 (60%)  | 0 (0%)   | 2 (40%)  |
| Viral                 | 10     | 14       | 2 (14%)  | 10 (71%) | 2 (14%)  |
| <b>Flooding</b>       | 14     | 25       | 19 (76%) | 0 (0%)   | 6 (24%)  |
| All-cause             | 12     | 17       | 14 (82%) | 0 (0%)   | 3 (18%)  |
| Bacterial             | 2      | 4        | 3 (75%)  | 0 (0%)   | 1 (25%)  |
| Protozoan             | 2      | 3        | 1 (33%)  | 0 (0%)   | 2 (67%)  |
| Viral                 | 1      | 1        | 1 (100%) | 0 (0%)   | 0 (0%)   |
| <b>Heavy rainfall</b> | 10     | 14       | 10 (71%) | 3 (21%)  | 1 (7%)   |
| All-cause             | 8      | 11       | 8 (73%)  | 2 (18%)  | 1 (9%)   |
| Bacterial             | 2      | 3        | 2 (67%)  | 1 (33%)  | 0 (0%)   |
| Protozoan             | 0      | --       | --       | --       | --       |
| Viral                 | 0      | --       | --       | --       | --       |
| <b>Drought</b>        | 2      | 2        | 1 (50%)  | 0 (0%)   | 1 (50%)  |
| All-cause             | 2      | 2        | 1 (50%)  | 0 (0%)   | 1 (50%)  |
| Bacterial             | 0      | --       | --       | --       | --       |
| Protozoan             | 0      | --       | --       | --       | --       |
| Viral                 | 0      | --       | --       | --       | --       |
